# Supplementary material for: Effects of gender and socio-environmental factors on health-care access in oncology: a comprehensive, nationwide study in France
Source: PubMed Central journal article supplement — eClinicalMedicine. 2023 Nov 1;65:102298. doi: 10.1016/j.eclinm.2023.102298 (PMC10641482; doi:10.1016/j.eclinm.2023.102298), 2023-11-01
Supplement: mmc1.pdf [file mmc1.pdf]

## Supplementary material

|                                                                                                                                                                                                                                                                                                                                                                                                                                                                                                                                                                                                                                                                                                                                                         |           |
|---------------------------------------------------------------------------------------------------------------------------------------------------------------------------------------------------------------------------------------------------------------------------------------------------------------------------------------------------------------------------------------------------------------------------------------------------------------------------------------------------------------------------------------------------------------------------------------------------------------------------------------------------------------------------------------------------------------------------------------------------------|-----------|
| <b>Supplementary material 1. Flow-chart for patient selection.....</b>                                                                                                                                                                                                                                                                                                                                                                                                                                                                                                                                                                                                                                                                                  | <b>2</b>  |
| <b>Supplementary material 2. STROBE Statement.....</b>                                                                                                                                                                                                                                                                                                                                                                                                                                                                                                                                                                                                                                                                                                  | <b>3</b>  |
| <b>Supplementary material 3. Details on the methodology of comorbidities .....</b>                                                                                                                                                                                                                                                                                                                                                                                                                                                                                                                                                                                                                                                                      | <b>5</b>  |
| <b>Supplementary material 4. List of the 32 variables and their contribution to the oncological and surgical expertise score .....</b>                                                                                                                                                                                                                                                                                                                                                                                                                                                                                                                                                                                                                  | <b>6</b>  |
| <b>Supplementary material 5. List of the 71 socio-environmental variables and their contribution to the 8 socio-environmental indices (Economic deprivation, Education barriers, Familial hardship, Gender-related wage disparities, Insecurity, Social Isolation, Inaccessibility to Public Transportation, and Unemployment).....</b>                                                                                                                                                                                                                                                                                                                                                                                                                 | <b>7</b>  |
| <b>Supplementary material 6. Model assumptions. (A) Distribution of absolute cancer care expertise index: without transformation, with square root transformation, with cube root transformation, and with log transformation. (B) Residual plots for each predictor to assess linearity assumption in the absolute cancer care expertise index model with cube root transformation. (C) Distribution of relative cancer care expertise index: without transformation, with square root transformation, with cube root transformation, and with log transformation. (D) Residual plots for each predictor to assess linearity assumption in the relative cancer care expertise index model with cube root transformation. ....</b>                      | <b>9</b>  |
| <b>Supplementary material 7. Distribution of cancer type. (A) Overall population. (B) Women. (C) Men. ....</b>                                                                                                                                                                                                                                                                                                                                                                                                                                                                                                                                                                                                                                          | <b>13</b> |
| <b>Supplementary material 8. Overview of the facilities included in the study. (A) Distribution of annual volume by cancer type, defined by the annual number of treated cancer patients per centre per cancer type. (B) Distribution of the median centre volume in which women/men are treated for their cancer. (C) Percentage of centres engaged in oncological-related activities. (D) Distribution of oncological and surgical expertise scores among centres. (E) Distribution of the distance in kilometres from patients' homes to hospitals, stratified by cancer type and gender. (F) Distribution of absolute cancer care expertise index across centres. (G) Distribution of relative cancer care expertise index across centres. ....</b> | <b>14</b> |
| <b>Supplementary material 9. Mapping of socio-environmental indices. (A) Economic deprivation. (B) Educational barriers. (C) Gender-related wage disparities. (D) Unemployment. (E) Social isolation. (F) Inaccessibility to public transport. (G) Insecurity. (F) Familial hardship. ....</b>                                                                                                                                                                                                                                                                                                                                                                                                                                                          | <b>16</b> |
| <b>Supplementary material 10. Sensitivity analysis: Multivariable mixed linear model with only non-sex-specific cancers .....</b>                                                                                                                                                                                                                                                                                                                                                                                                                                                                                                                                                                                                                       | <b>24</b> |
| <b>REFERENCES .....</b>                                                                                                                                                                                                                                                                                                                                                                                                                                                                                                                                                                                                                                                                                                                                 | <b>25</b> |

**Supplementary material 1. Flow-chart for patient selection**

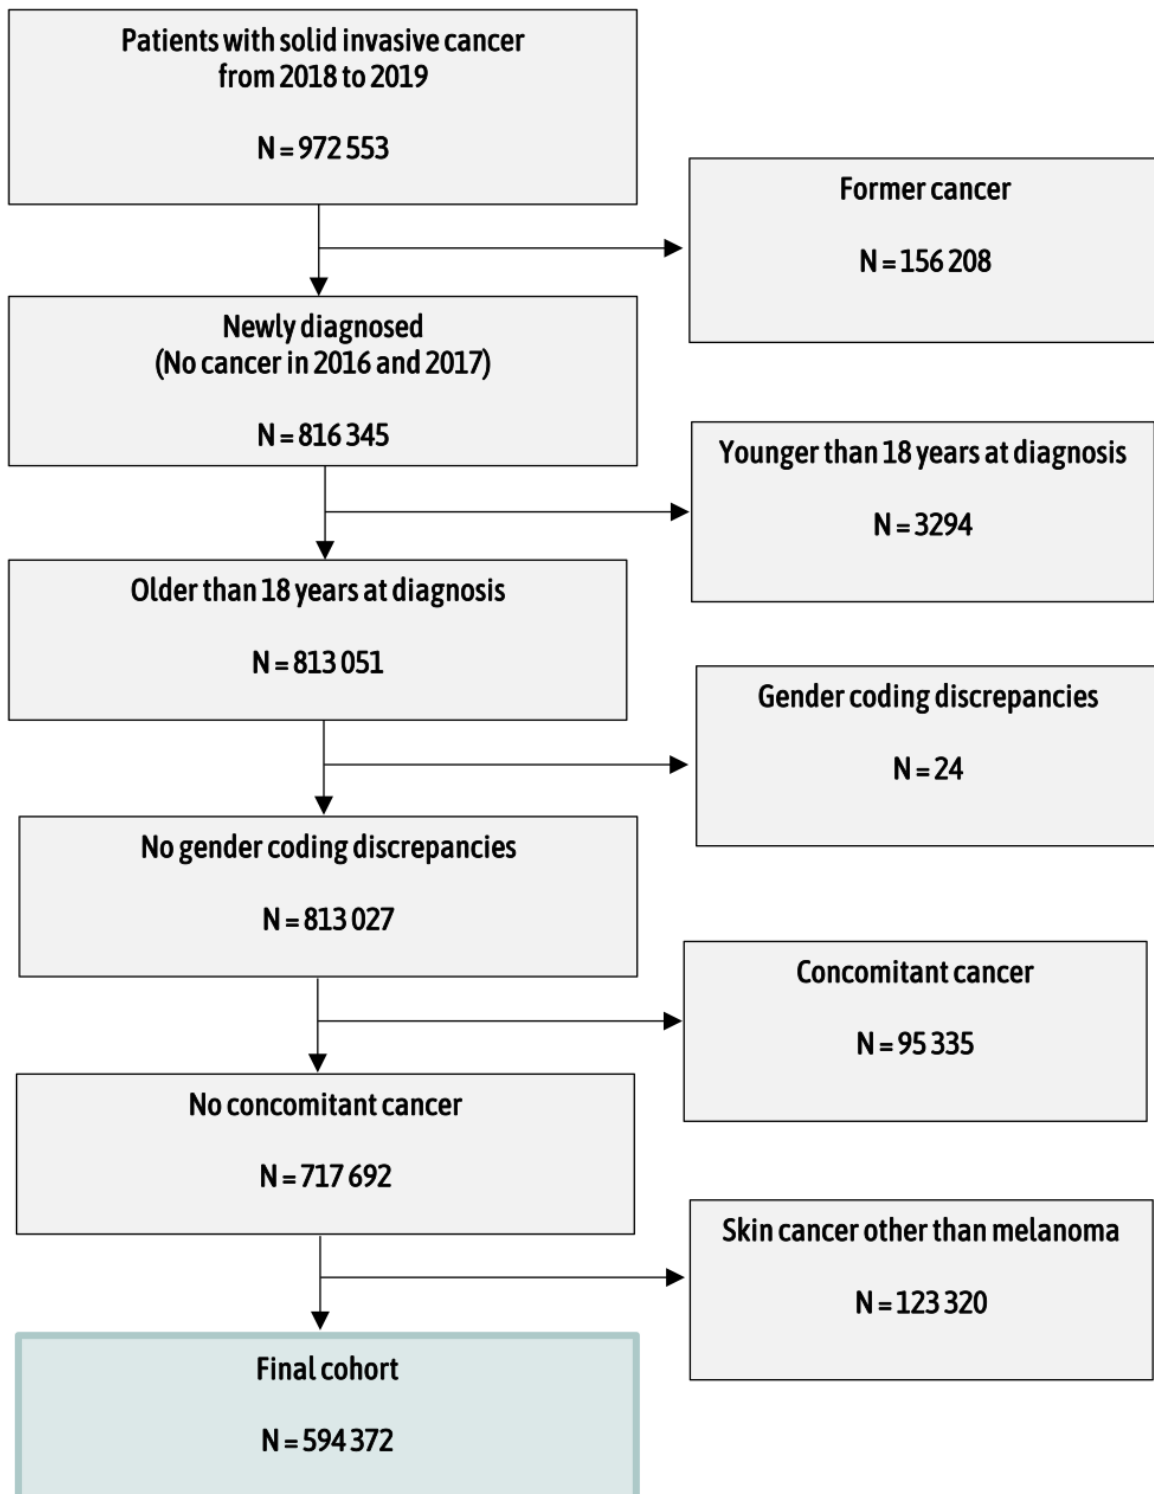

## Supplementary material 2. STROBE Statement

STROBE Statement—Checklist of items that should be included in reports of *cohort studies*

|                          | <b>Item No</b> | <b>Recommendation</b>                                                                                                                                                                                                                                                                                                  | <b>Page No</b>            |
|--------------------------|----------------|------------------------------------------------------------------------------------------------------------------------------------------------------------------------------------------------------------------------------------------------------------------------------------------------------------------------|---------------------------|
| Title and abstract       | 1              | (a) Indicate the study's design with a commonly used term in the title or the abstract                                                                                                                                                                                                                                 | 1                         |
|                          |                | (b) Provide in the abstract an informative and balanced summary of what was done and what was found                                                                                                                                                                                                                    | 2                         |
| <b>Introduction</b>      |                |                                                                                                                                                                                                                                                                                                                        |                           |
| Background/rationale     | 2              | Explain the scientific background and rationale for the investigation being reported                                                                                                                                                                                                                                   | 4                         |
| Objectives               | 3              | State specific objectives, including any prespecified hypotheses                                                                                                                                                                                                                                                       | 5                         |
| <b>Methods</b>           |                |                                                                                                                                                                                                                                                                                                                        |                           |
| Study design             | 4              | Present key elements of study design early in the paper                                                                                                                                                                                                                                                                | 5-6                       |
| Setting                  | 5              | Describe the setting, locations, and relevant dates, including periods of recruitment, exposure, follow-up, and data collection                                                                                                                                                                                        | 5-6                       |
| Participants             | 6              | (a) Give the eligibility criteria, and the sources and methods of selection of participants. Describe methods of follow-up<br>(b) For matched studies, give matching criteria and number of exposed and unexposed                                                                                                      | 5-6                       |
| Variables                | 7              | Clearly define all outcomes, exposures, predictors, potential confounders, and effect modifiers. Give diagnostic criteria, if applicable                                                                                                                                                                               | 7-8                       |
| Data sources/measurement | 8*             | For each variable of interest, give sources of data and details of methods of assessment (measurement). Describe comparability of assessment methods if there is more than one group                                                                                                                                   | 7-8                       |
| Bias                     | 9              | Describe any efforts to address potential sources of bias                                                                                                                                                                                                                                                              | 8                         |
| Study size               | 10             | Explain how the study size was arrived at                                                                                                                                                                                                                                                                              | 5-6                       |
| Quantitative variables   | 11             | Explain how quantitative variables were handled in the analyses. If applicable, describe which groupings were chosen and why                                                                                                                                                                                           | 7-8                       |
| Statistical methods      | 12             | (a) Describe all statistical methods, including those used to control for confounding<br>(b) Describe any methods used to examine subgroups and interactions<br>(c) Explain how missing data were addressed<br>(d) If applicable, explain how loss to follow-up was addressed<br>(e) Describe any sensitivity analyses | 8-9<br>8-9<br>9<br>9<br>9 |
| <b>Results</b>           |                |                                                                                                                                                                                                                                                                                                                        |                           |
| Participants             | 13*            | (a) Report numbers of individuals at each stage of study—eg numbers potentially eligible, examined for eligibility, confirmed eligible, included in the study, completing follow-up, and analysed<br>(b) Give reasons for non-participation at each stage                                                              | 10<br>5-6                 |

|                          |     |                                                                                                                                                                                                              |       |
|--------------------------|-----|--------------------------------------------------------------------------------------------------------------------------------------------------------------------------------------------------------------|-------|
|                          |     | (c) Consider use of a flow diagram                                                                                                                                                                           | 5-6   |
| Descriptive data         | 14* | (a) Give characteristics of study participants (eg demographic, clinical, social) and information on exposures and potential confounders                                                                     | 10-11 |
|                          |     | (b) Indicate number of participants with missing data for each variable of interest                                                                                                                          | 21    |
|                          |     | (c) Summarise follow-up time (eg, average and total amount)                                                                                                                                                  |       |
| Outcome data             | 15* | Report numbers of outcome events or summary measures over time                                                                                                                                               | 10-13 |
| Main results             | 16  | (a) Give unadjusted estimates and, if applicable, confounder-adjusted estimates and their precision (eg, 95% confidence interval). Make clear which confounders were adjusted for and why they were included | 10-13 |
|                          |     | (b) Report category boundaries when continuous variables were categorized                                                                                                                                    |       |
|                          |     | (c) If relevant, consider translating estimates of relative risk into absolute risk for a meaningful time period                                                                                             |       |
| Other analyses           | 17  | Report other analyses done—eg analyses of subgroups and interactions, and sensitivity analyses                                                                                                               | 13    |
| <b>Discussion</b>        |     |                                                                                                                                                                                                              |       |
| Key results              | 18  | Summarise key results with reference to study objectives                                                                                                                                                     | 13-14 |
| Limitations              | 19  | Discuss limitations of the study, taking into account sources of potential bias or imprecision. Discuss both direction and magnitude of any potential bias                                                   | 15    |
| Interpretation           | 20  | Give a cautious overall interpretation of results considering objectives, limitations, multiplicity of analyses, results from similar studies, and other relevant evidence                                   | 13-14 |
| Generalisability         | 21  | Discuss the generalisability (external validity) of the study results                                                                                                                                        | 15-16 |
| <b>Other information</b> |     |                                                                                                                                                                                                              |       |
| Funding                  | 22  | Give the source of funding and the role of the funders for the present study and, if applicable, for the original study on which the present article is based                                                | 9     |



### **Supplementary material 3. Details on the methodology of comorbidities**

We relied on previously published articles<sup>1–10</sup> to define the list of considered comorbidities, together with the medical codes used to identify them in the French national health insurance database. Diagnosis codes were recorded with the International Classification of Diseases—10th revision, ICD-10<sup>11</sup>. Procedures were recorded with the CCAM classification (“Classification Communes des Actes Médicaux”). The final list of comorbidities included 51 pathologies, gathered into 12 categories: (1) Cardiovascular, (2) Endocrine, (3) Frailty, (4) Gastrointestinal, (5) Immune, (6) Kidney, (7) Liver, (8) Neurologic, (9) Psychiatric disorders, (10) Pulmonary, (11) Rheumatologic disease and connectivopathies, and (12) Other. A patient was suspected to suffer from a given comorbidity at the time of cancer diagnosis if there was at least one CCAM procedure code or ICD-10 diagnosis code associated with the given comorbidity in the year preceding the date of cancer diagnosis.

### Supplementary material 4. List of the 32 variables and their contribution to the oncological and surgical expertise score

We utilized Factor Analysis of Mixed Data (FAMD) to calculate an expertise score for each centre, which ranged from 0 (low expertise) to 1 (high expertise). The variables were scaled prior to computing the score, and the first Principal Component was used for this calculation. To improve the normality of the data distribution, we applied a logarithmic transformation to the computed score.

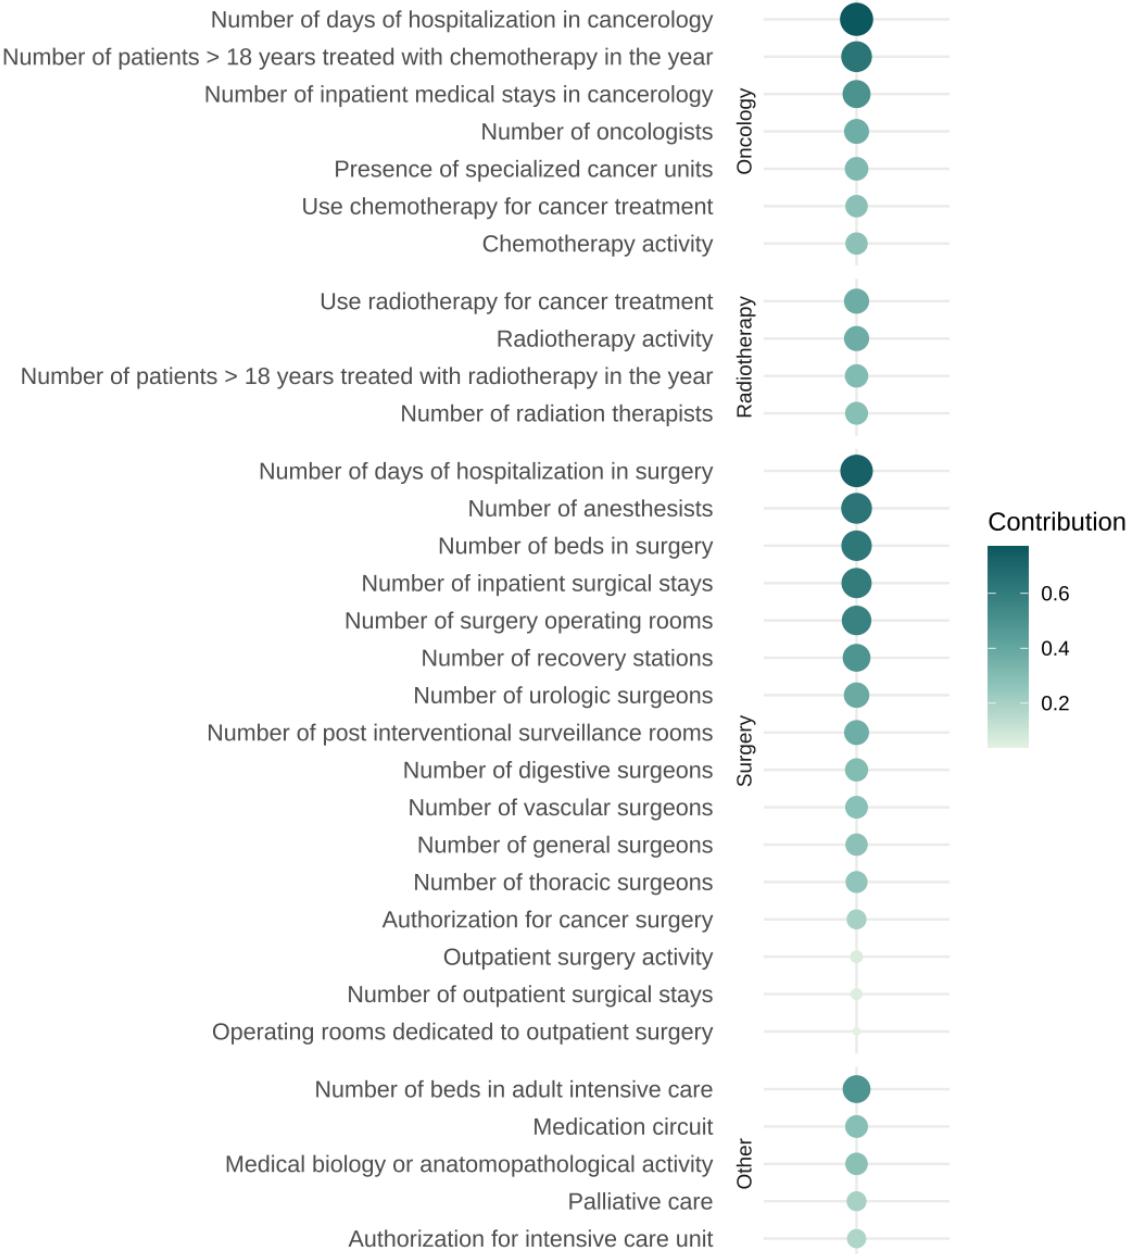

## Supplementary material 5. List of the 71 socio-environmental variables and their contribution to the 8 socio-environmental indices (Economic deprivation, Education barriers, Familial hardship, Gender-related wage disparities, Insecurity, Social Isolation, Inaccessibility to Public Transportation, and Unemployment)

The French national health insurance system reports the patient's place of residence with a unique geographic code. If the place of residence has more than 1000 inhabitants, the geographic code used is the zip code. For smaller communities, an aggregated zip code is used. Sociodemographic data for each patient's residential commune was collected and subsequently aggregated by geographic codes. In the rare instances where commune-level data was unavailable, the information was gathered, in order of preference, from the Public Establishment of Intermunicipal Cooperation (EPCI), arrondissement, or department.

To generate a socio-environmental score for each category, we used a Principal Component Analysis (PCA). The variables were scaled before computing the score. The first Principal Component was used for this calculation, except for familial hardship and educational barriers indices, where the Second Component was used for, as it provided a more accurate representation of the desired indices scores. To enhance the normality of the score distribution and ease interpretation, we applied a logarithmic transformation to each computed score. This transformation effectively rescaled the scores to fall within a range from 0, indicating a favourable environment, to 1, signifying an unfavourable environment.

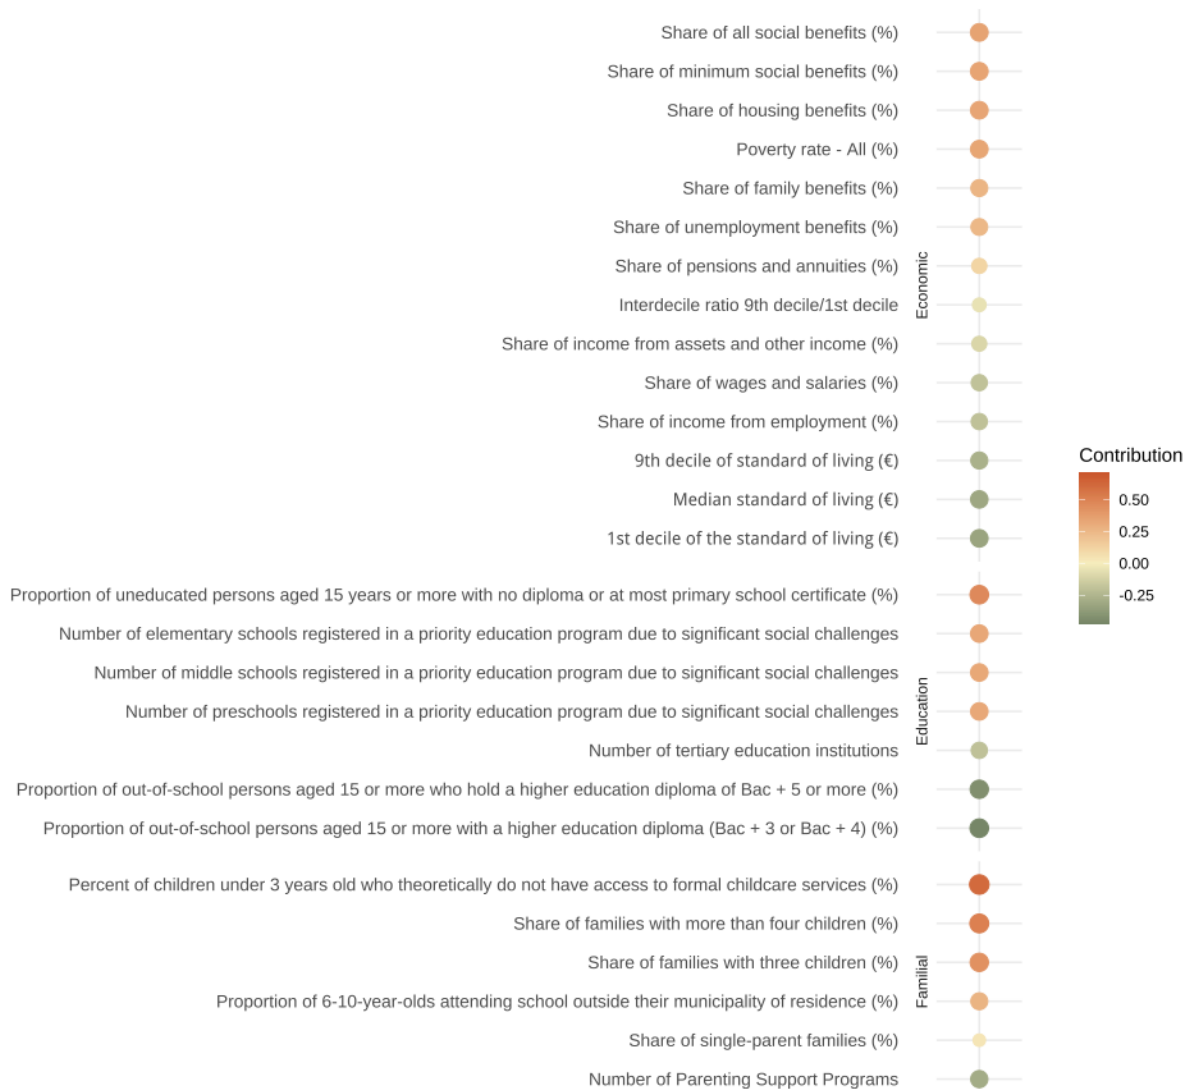

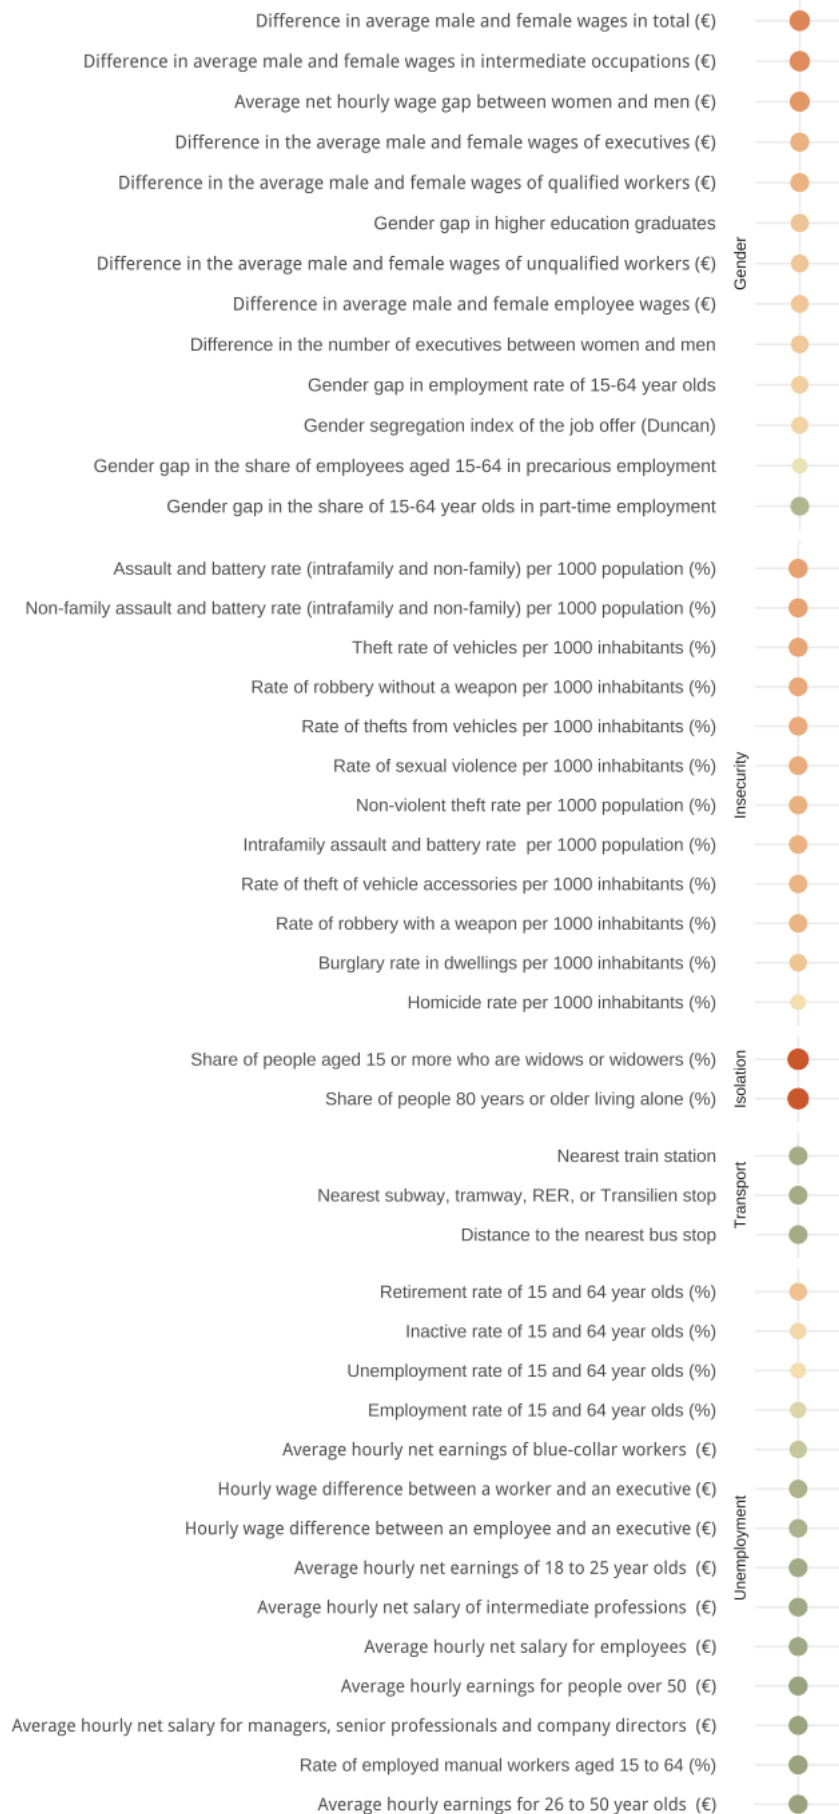

**Supplementary material 6. Model assumptions. (A) Distribution of absolute cancer care expertise index: without transformation, with square root transformation, with cube root transformation, and with log transformation. (B) Residual plots for each predictor to assess linearity assumption in the absolute cancer care expertise index model with cube root transformation. (C) Distribution of relative cancer care expertise index: without transformation, with square root transformation, with cube root transformation, and with log transformation. (D) Residual plots for each predictor to assess linearity assumption in the relative cancer care expertise index model with cube root transformation.**

The absolute cancer care expertise index has a right-skewed distribution with a skewness of 3.6 (0.0). The mean of absolute cancer care expertise index is 197 (316) and the median is 94 [32, 212]. Without transformation, the residuals have a right-skewed distribution of 2.5 (0.0). To better address the skewness and optimize the distribution of absolute cancer care expertise index, we considered square root transformation, cube root transformation, and log transformation. The cube root transformation proved to be more effective, bringing the skewness of residual distribution to 0.1 (0.0).

A.

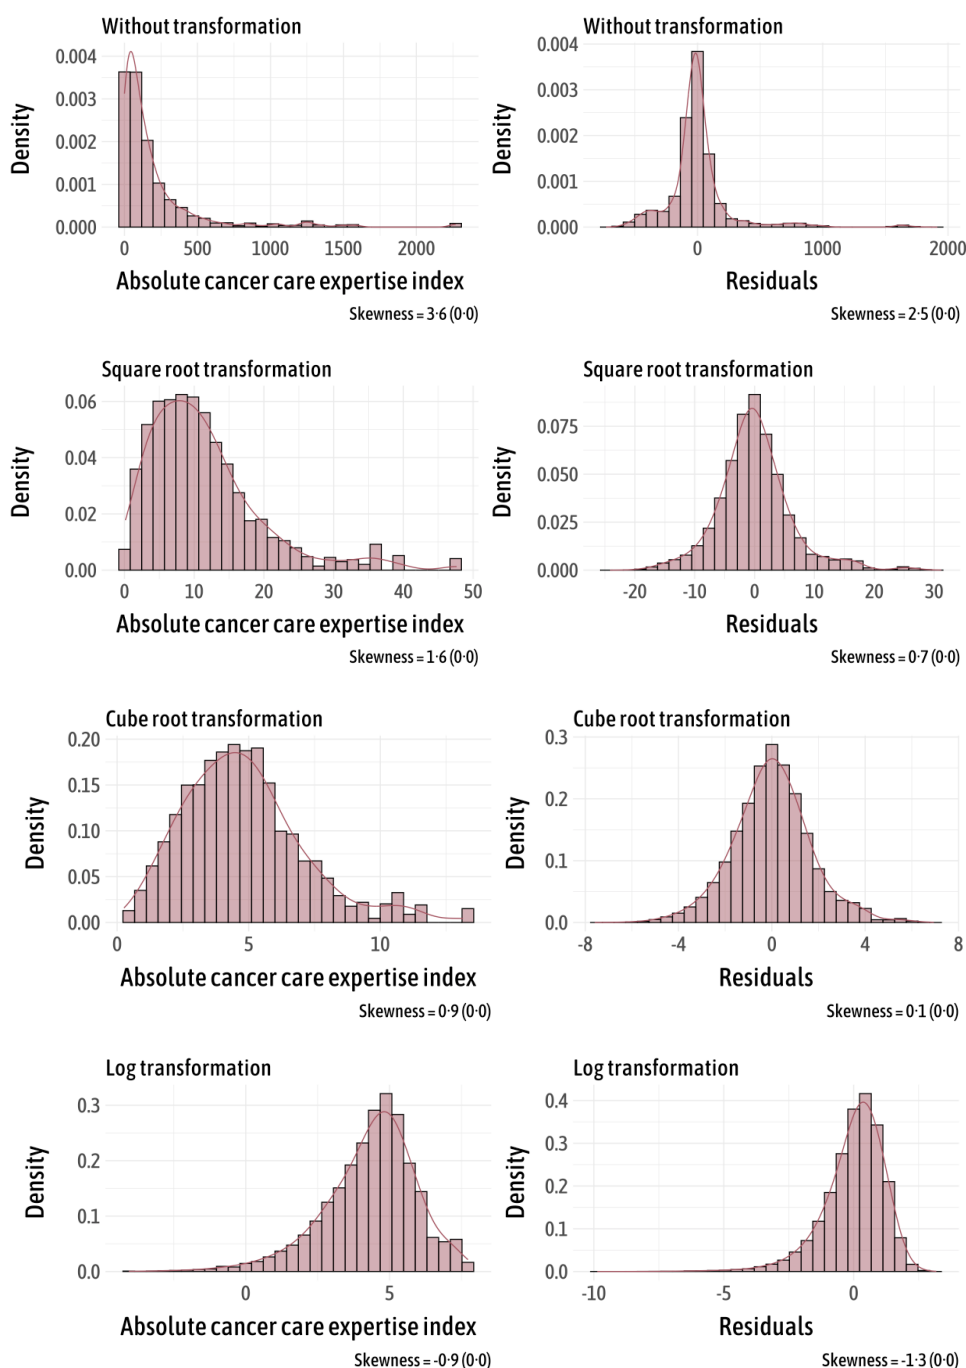

B.

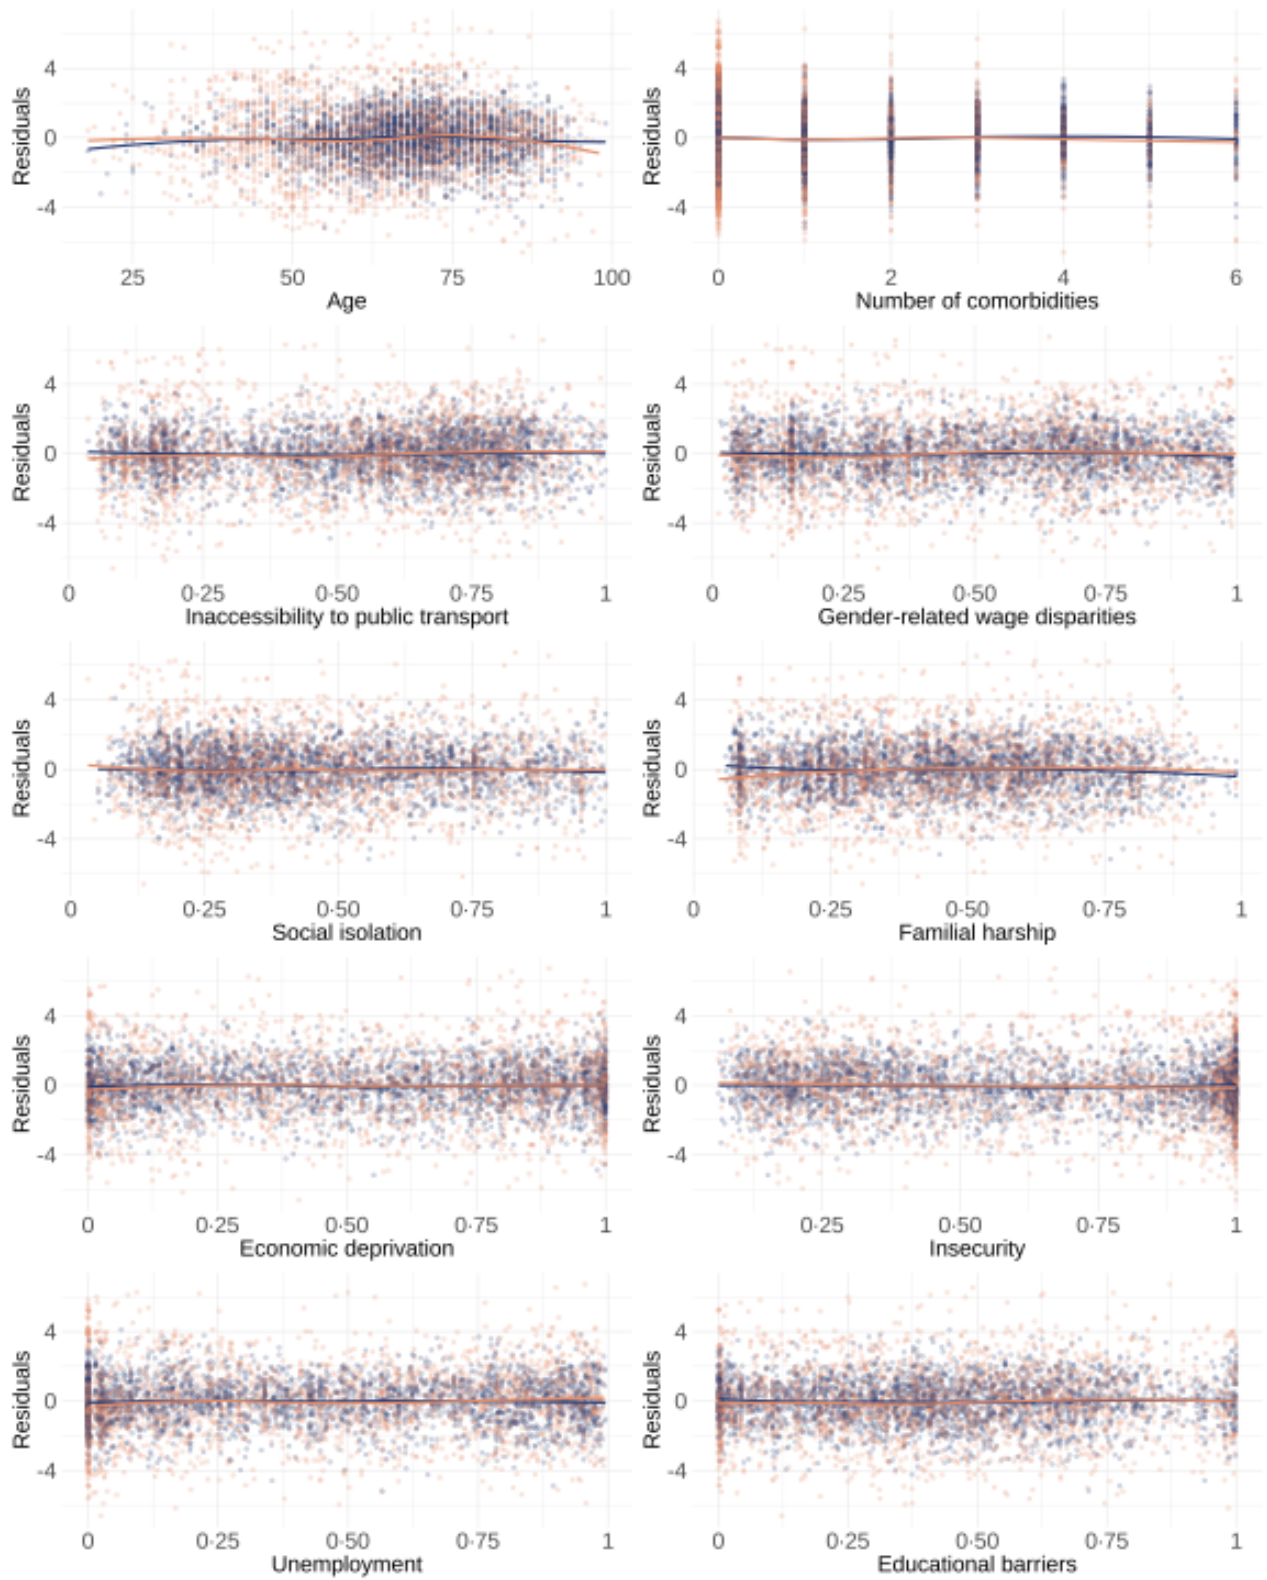

The relative cancer care expertise index is equal to the relative specific volume multiplied by the oncological and surgical expertise score. Relative specific volume was calculated by dividing the number of patients treated for a particular cancer type in one centre by the total number of patients treated for that same cancer type across all centres, then multiplying the result by 10 000. Thus, a centre with an expertise score of 0.9 treating 20 peritoneal cancers out of 600 total peritoneal cancers this year will have a score of  $20/600 * 10\ 000 * 0.9 = 300$ , and a centre with an expertise score of 0.9 treating 600 lung cancers out of 30 000 will have a score of  $600/30000 * 10\ 000 * 0.9 = 180$ .

The relative cancer care expertise index has a right-skewed distribution with a skewness of 13.2 (0.0). The mean of relative cancer care expertise index is 61 (103) and the median is 34 [16, 73]. Without transformation, the residuals have a right-skewed distribution of 4.9 (0.0). To better address the skewness and optimize the distribution of relative cancer care expertise index, we considered square root transformation, cube root transformation, and log transformation. The cube root transformation proved to be again the more effective, bringing the skewness of residual distribution to 0.1 (0.0).

C.

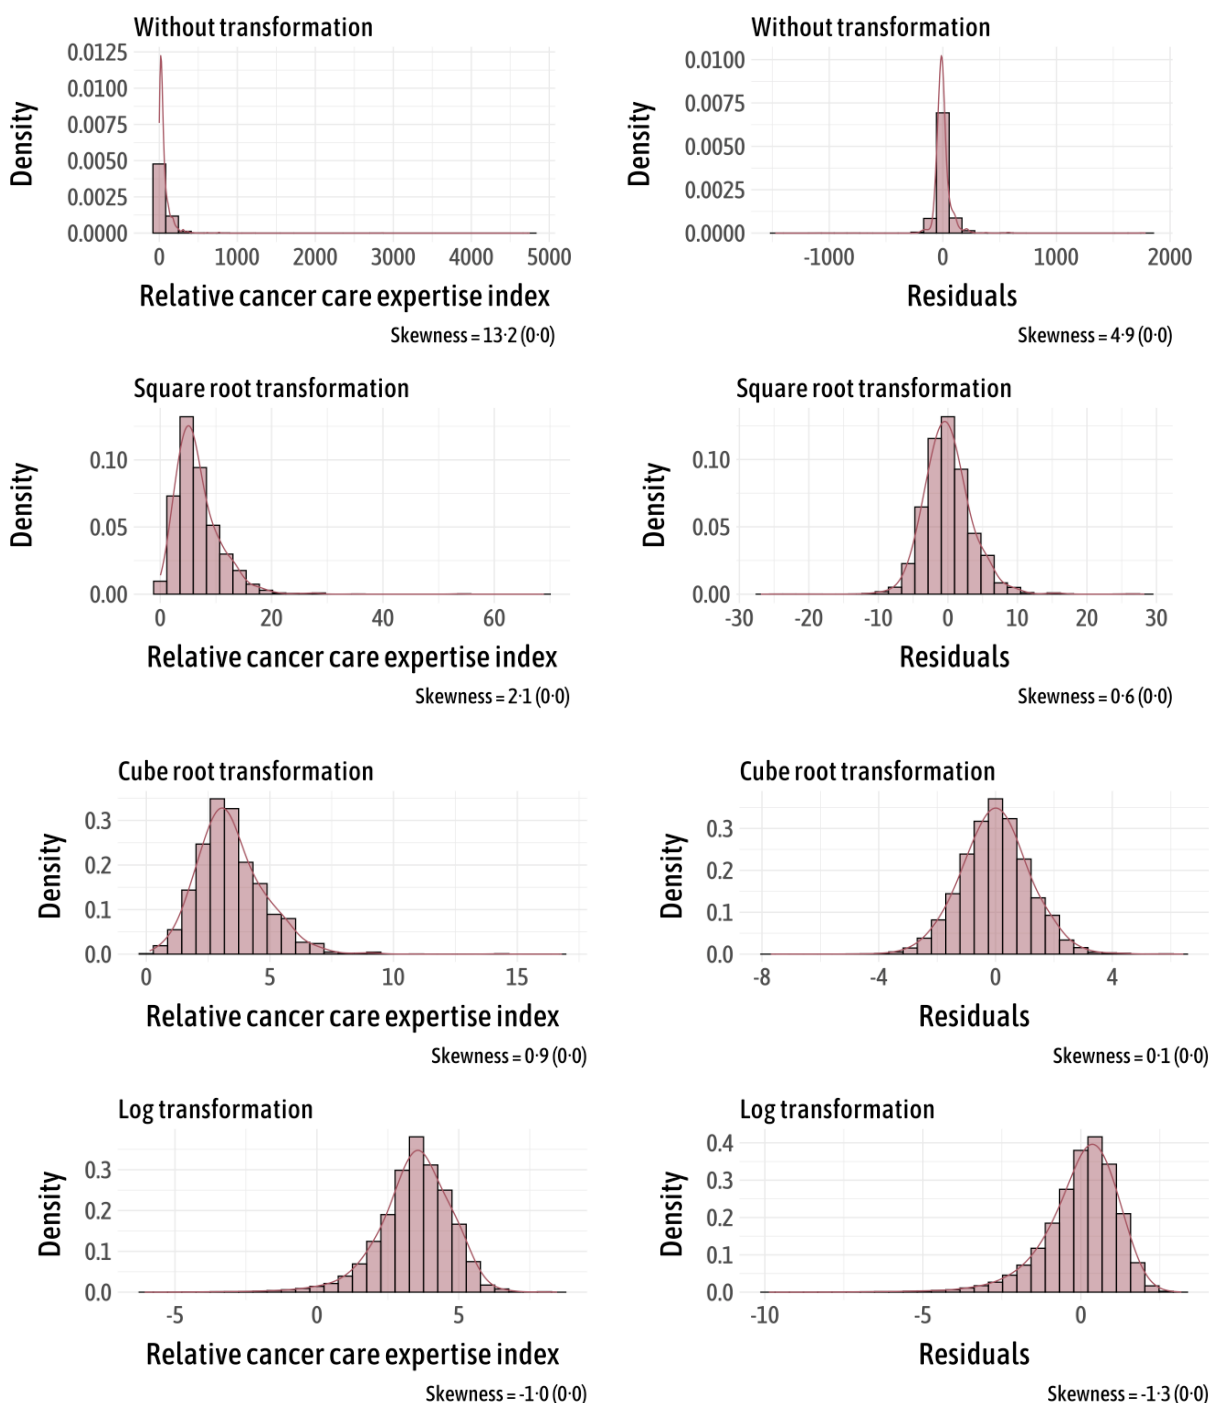



D.

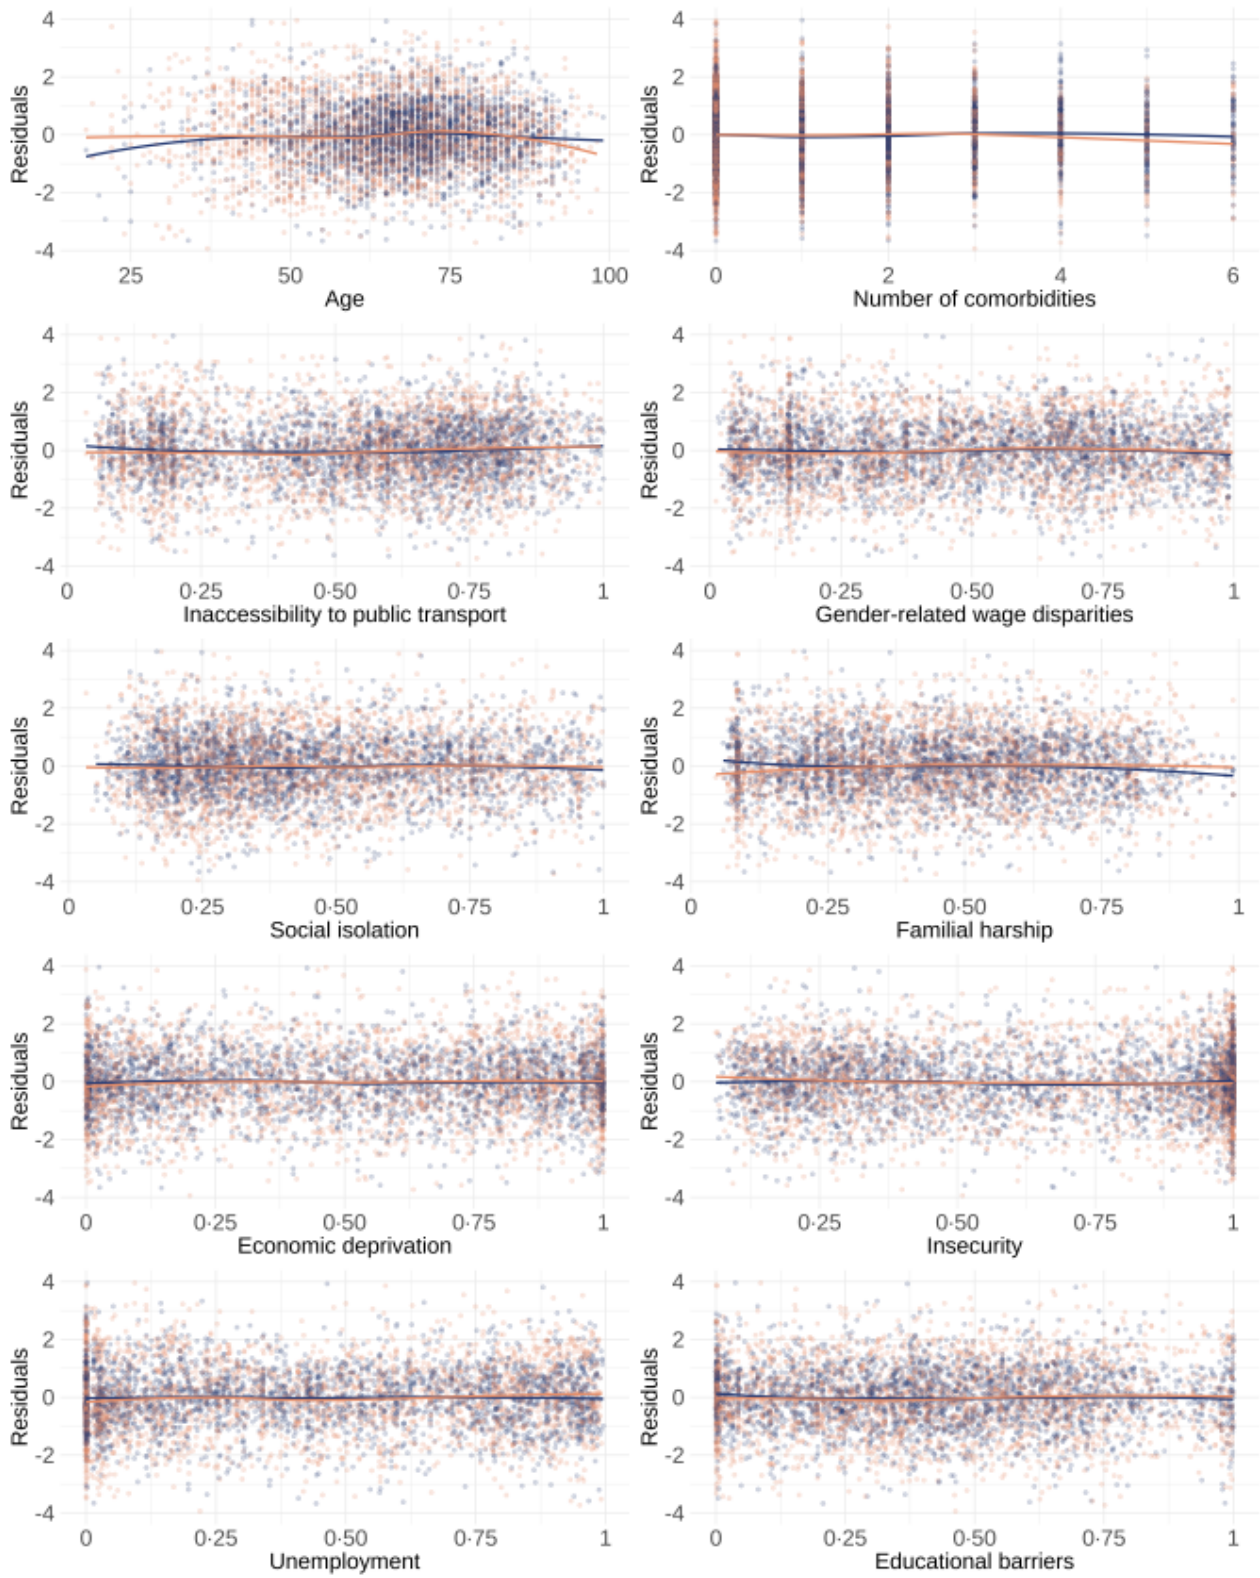



**Supplementary material 7. Distribution of cancer type. (A) Overall population. (B) Women. (C) Men.**

A.

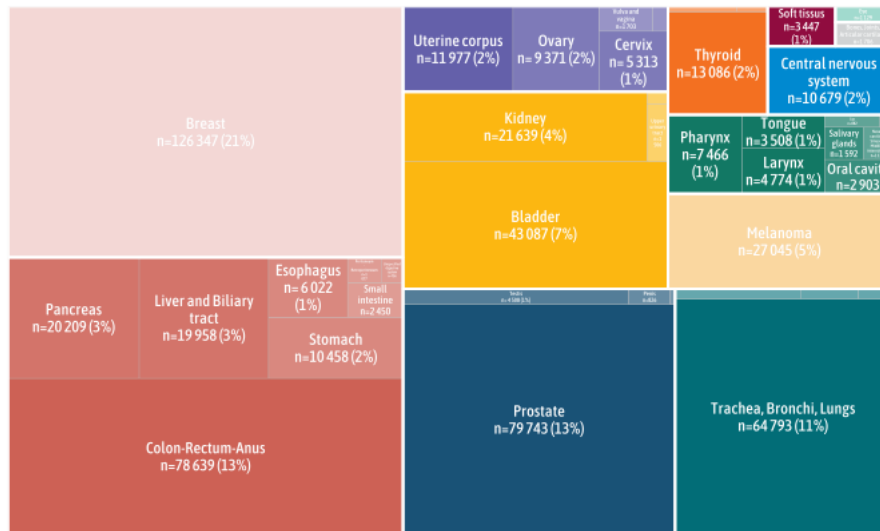

B.

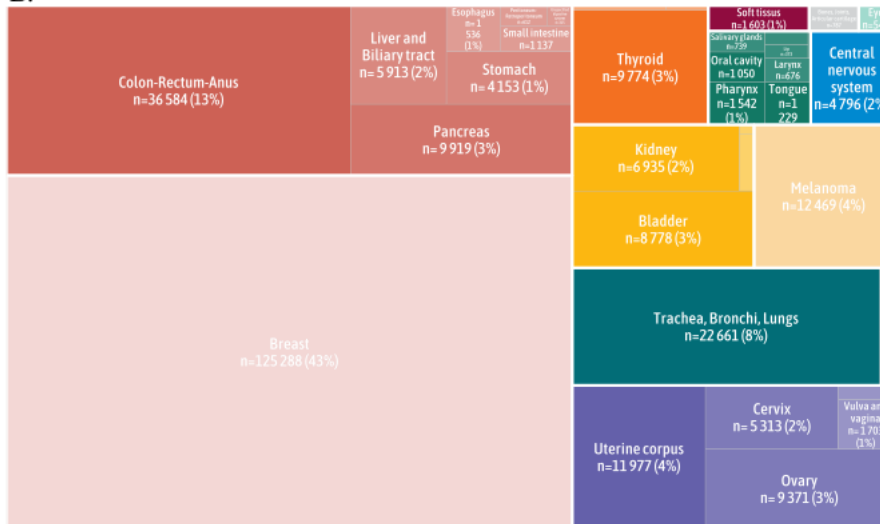

C.

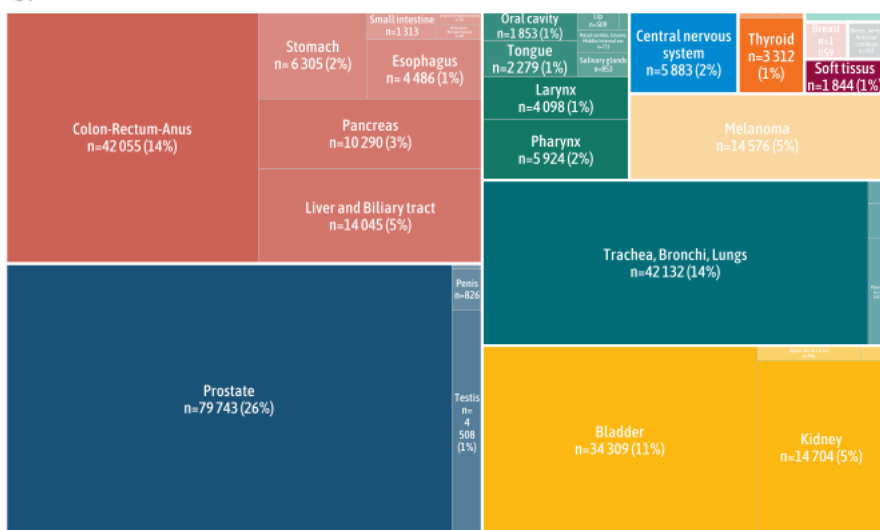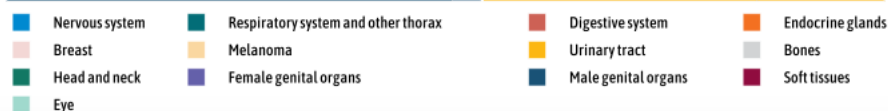

**Supplementary material 8. Overview of the facilities included in the study. (A) Distribution of annual volume by cancer type, defined by the annual number of treated cancer patients per centre per cancer type. (B) Distribution of the median centre volume in which women/men are treated for their cancer. (C) Percentage of centres engaged in oncological-related activities. (D) Distribution of oncological and surgical expertise scores among centres. (E) Distribution of the distance in kilometres from patients' homes to hospitals, stratified by cancer type and gender. (F) Distribution of absolute cancer care expertise index across centres. (G) Distribution of relative cancer care expertise index across centres.**

The analysis of centre volume reveals a majority of low-volume centres across all cancer types. However, for certain cancers like central nervous system cancers (with a median centre volume of 2), these low-volume centres coexist with high-volume centres that handle the majority of patients. As a result, women and men are most often treated for their central nervous system cancers at centres with median volumes of 62. In contrast, some cancer types, such as pharyngeal cancer (median centre volume at 2), exhibit a low median centre volume with only a few high-volume centres. Consequently, women and men with pharyngeal cancer typically received treatment at centres with a median annual volume of 23.

In Figures A, B, and E, boxplots are used to depict the data distribution. They display the median and interquartile range (IQR). Whiskers on these plots extend up to 1.5 times the IQR from the box. Figure A also shows individual data points beyond the whiskers, indicating potential outliers. The p-value for Figure B signifies the statistical significance of differences between the two gender groups concerning centre volume, whereas for Figure E, it indicates the significance of differences related to distance.

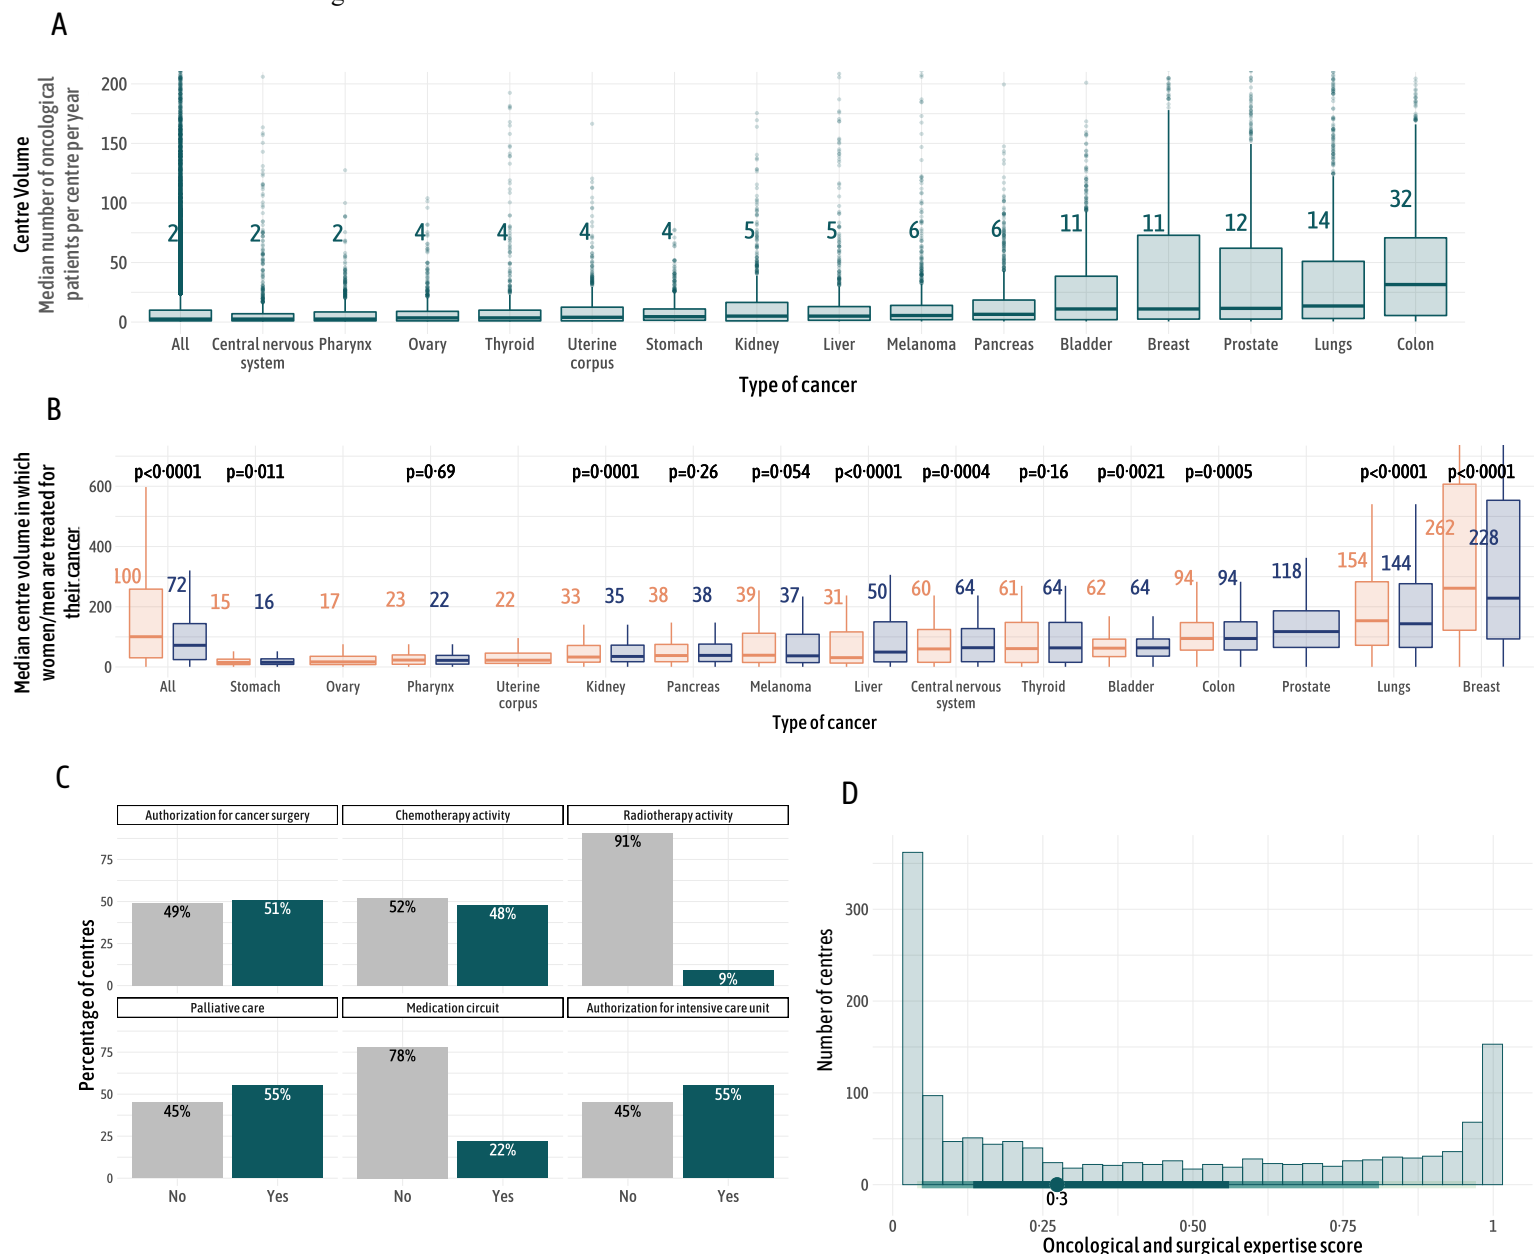

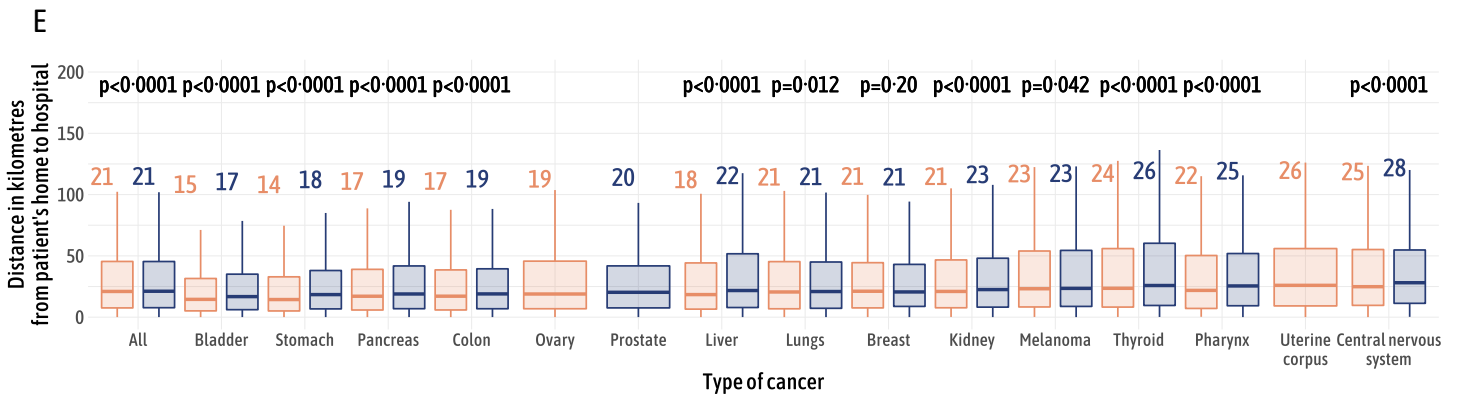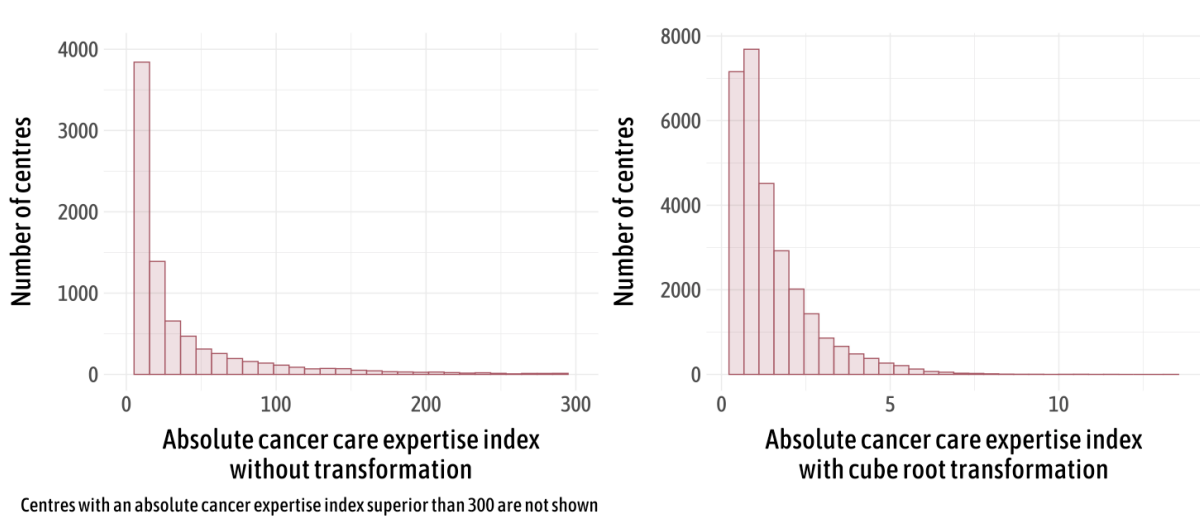

A centre might appear multiple times in this plot due to variations in its absolute cancer care expertise index across different cancer types.

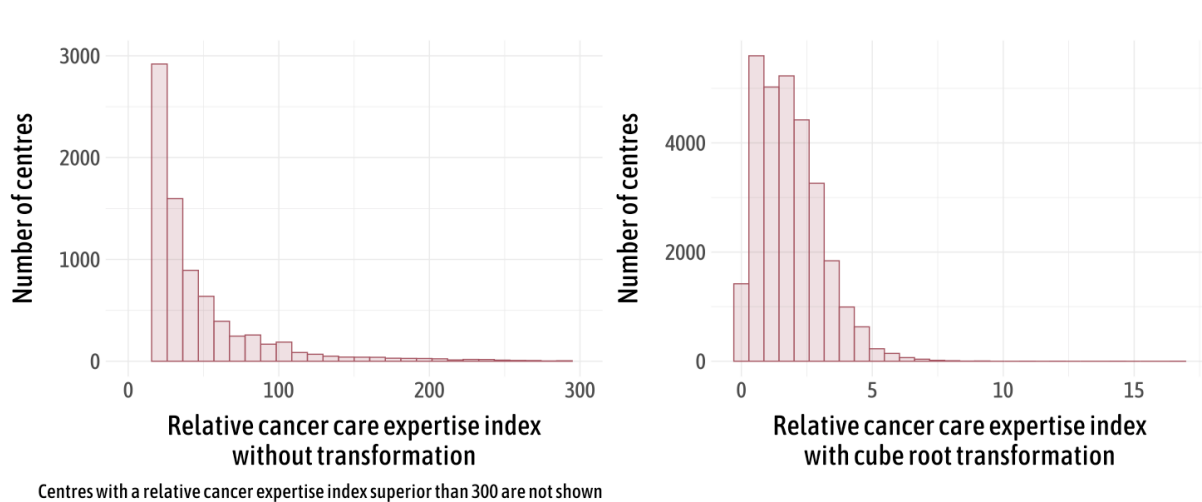

A centre might appear multiple times in this plot due to variations in its relative cancer care expertise index across different cancer types.

Supplementary material 9. Mapping of socio-environmental indices. (A) Economic deprivation. (B) Educational barriers. (C) Gender-related wage disparities. (D) Unemployment. (E) Social isolation. (F) Inaccessibility to public transport. (G) Insecurity. (F) Familial hardship.

A.

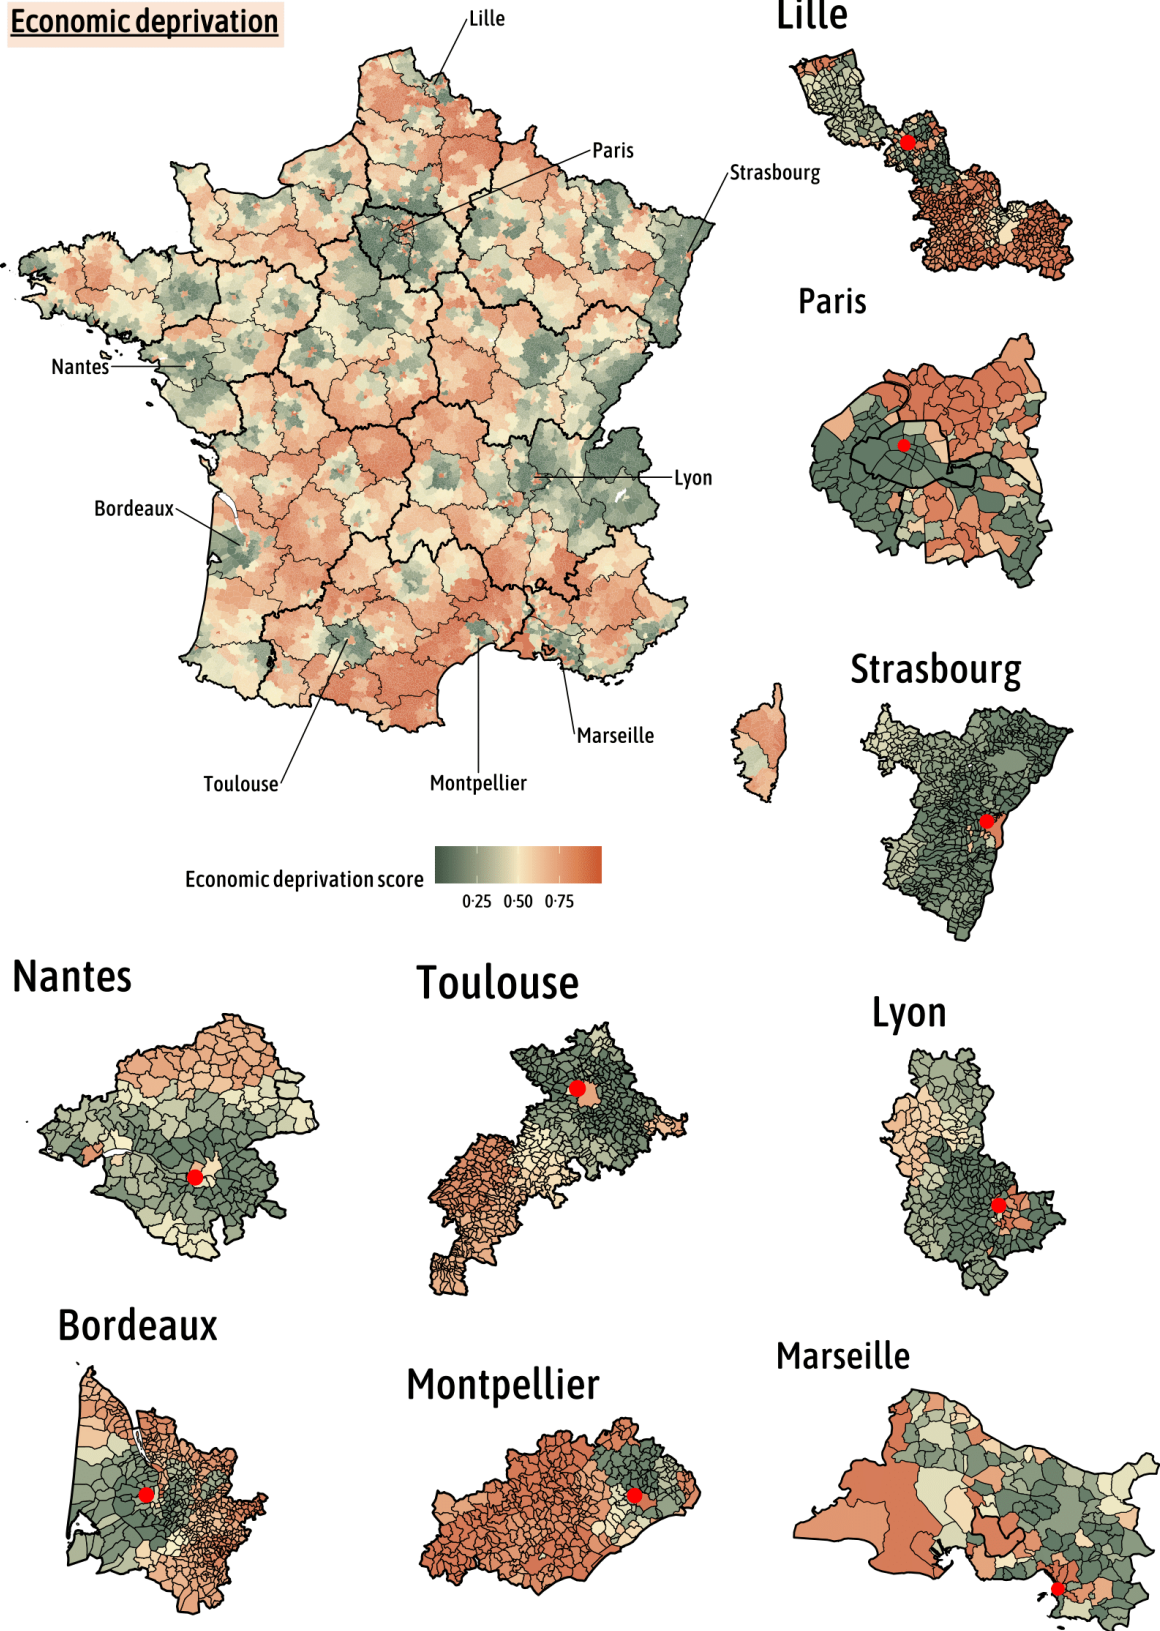

B.

**Educational barriers**

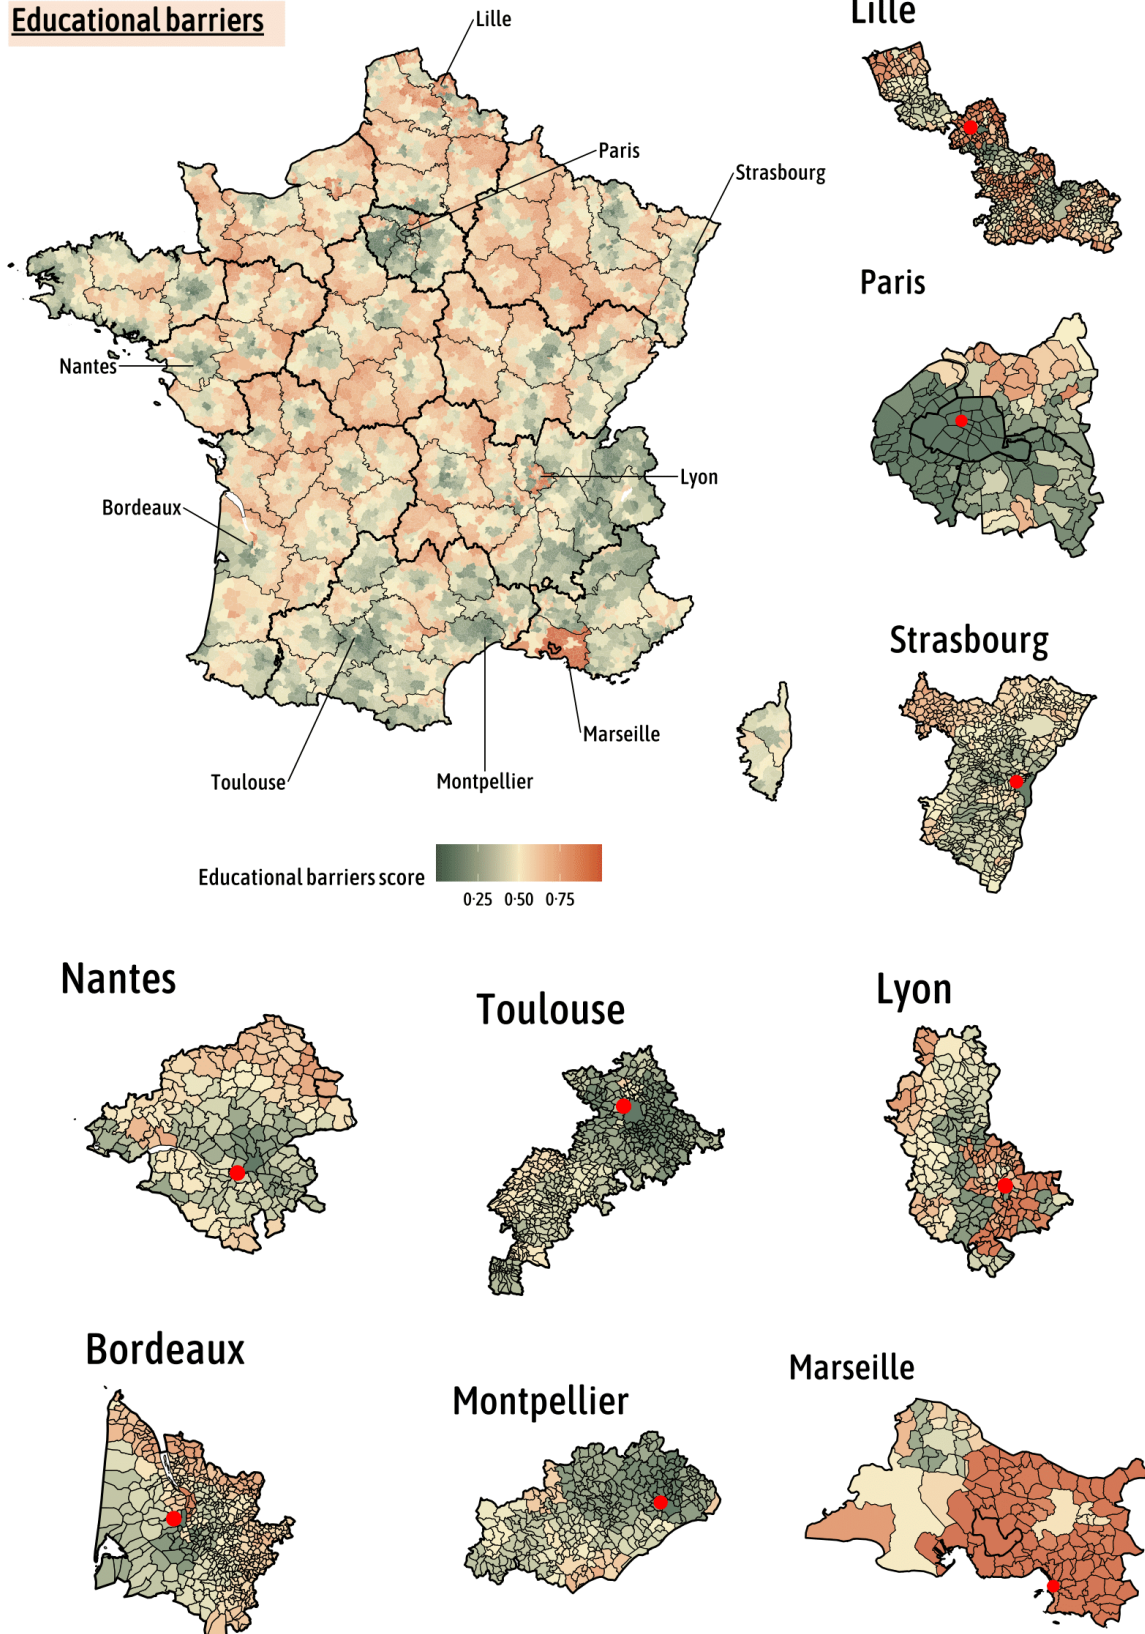



C.

**Gender-related wage disparities**

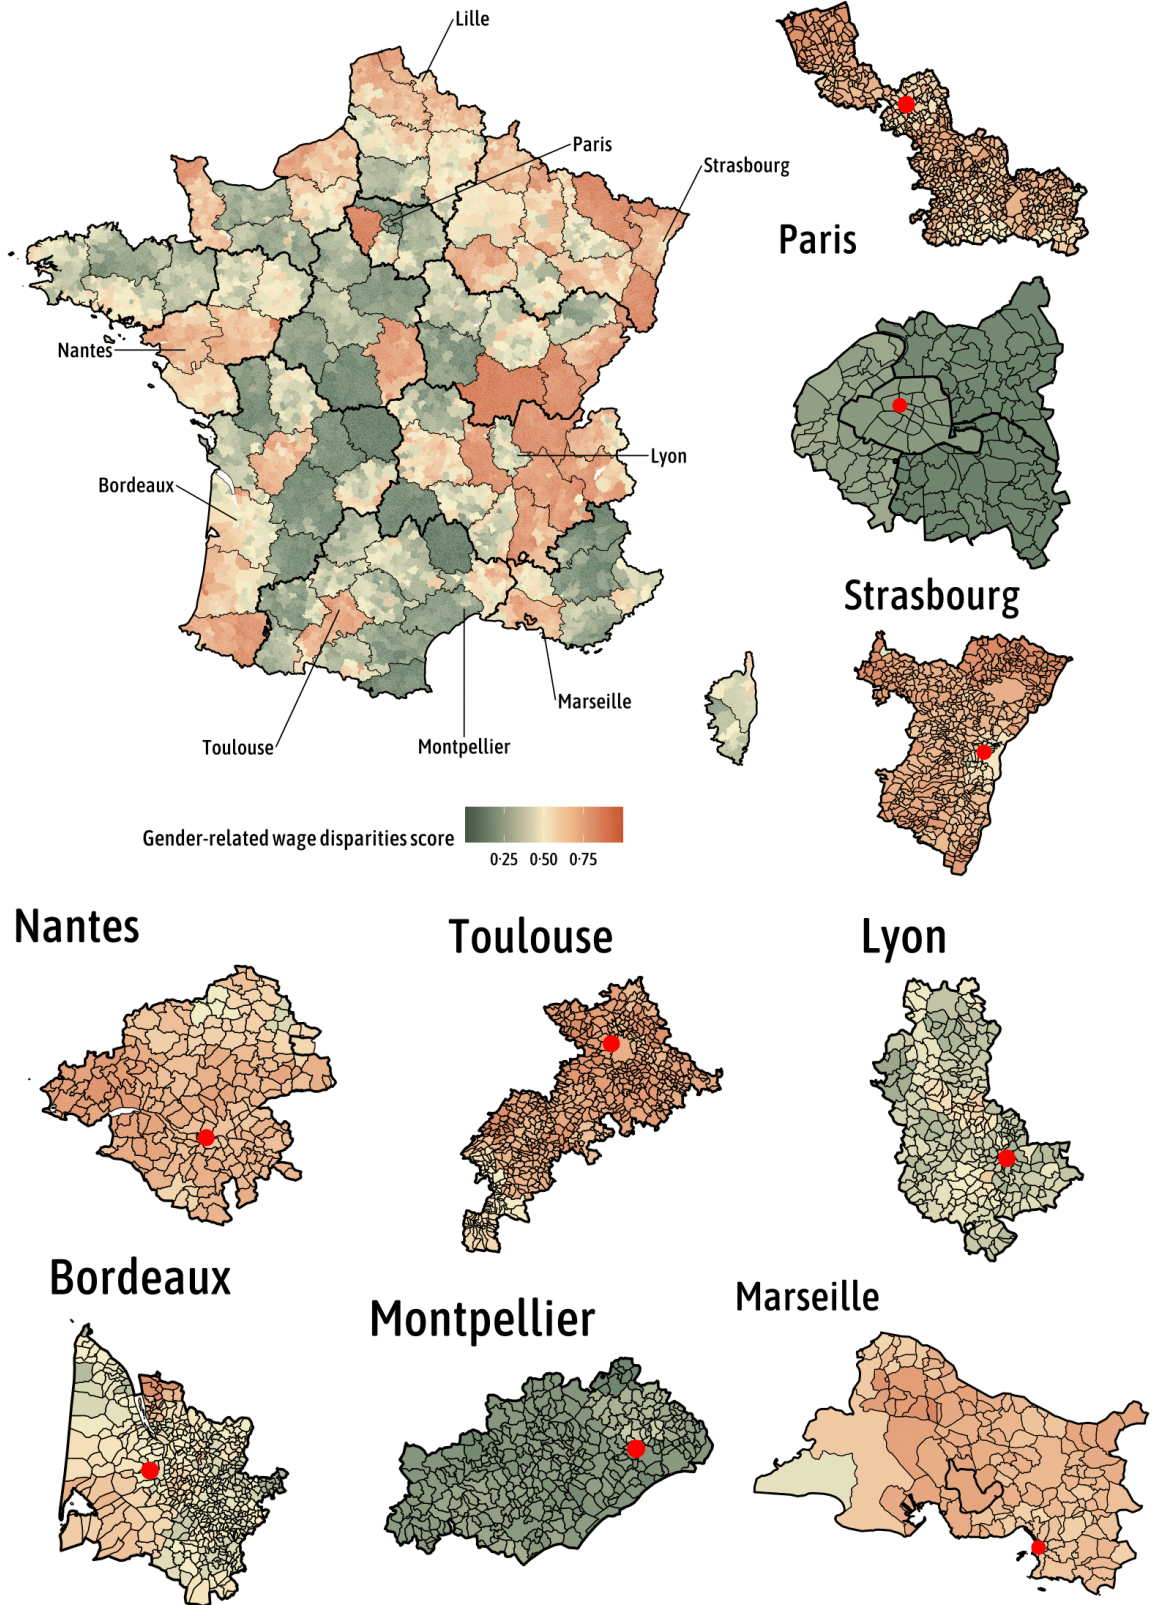

D.

**Unemployment**

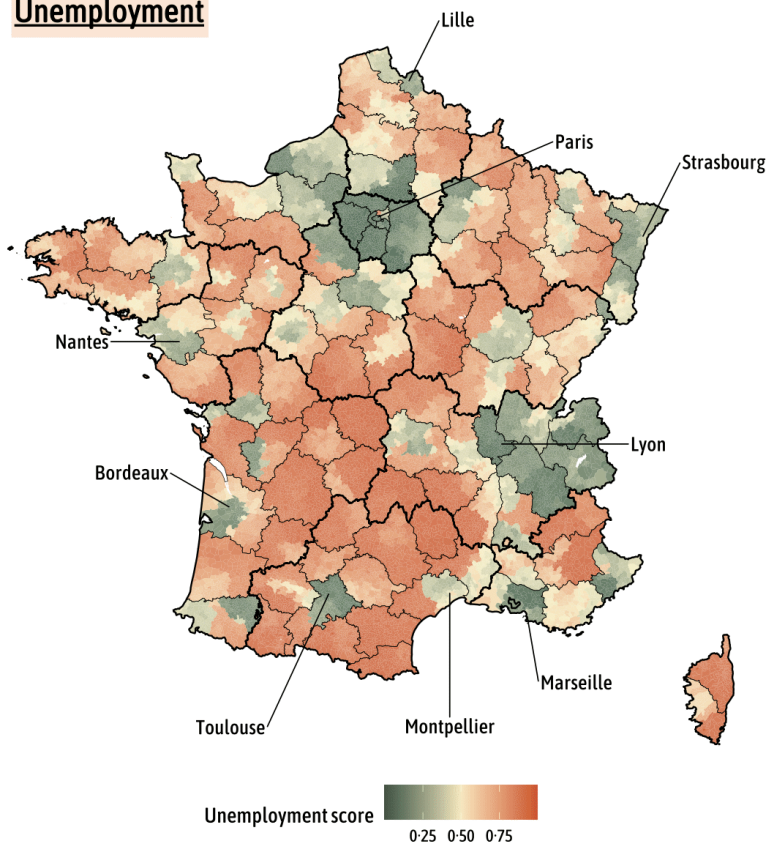

**Lille**

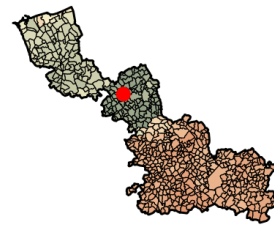

**Paris**

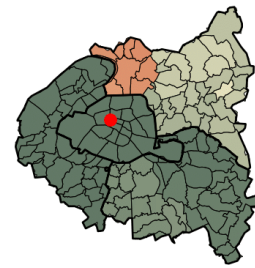

**Strasbourg**

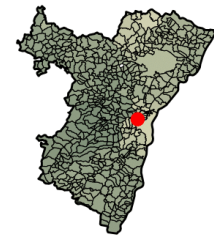

**Nantes**

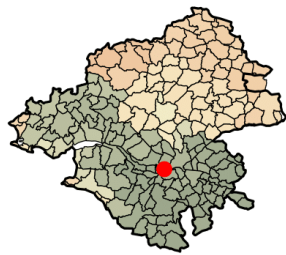

**Toulouse**

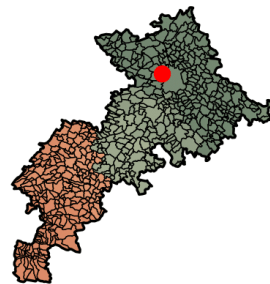

**Lyon**

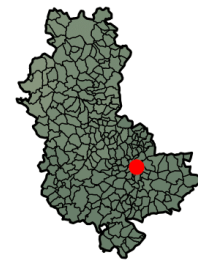

**Bordeaux**

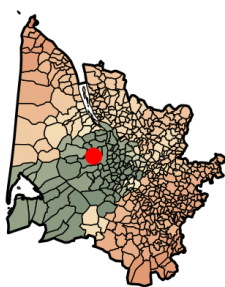

**Montpellier**

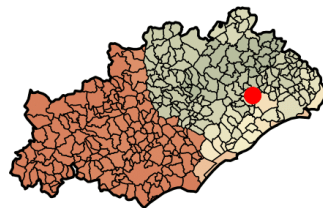

**Marseille**

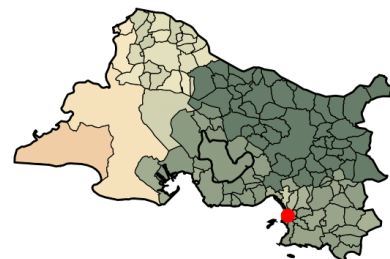



E.

**Social isolation**

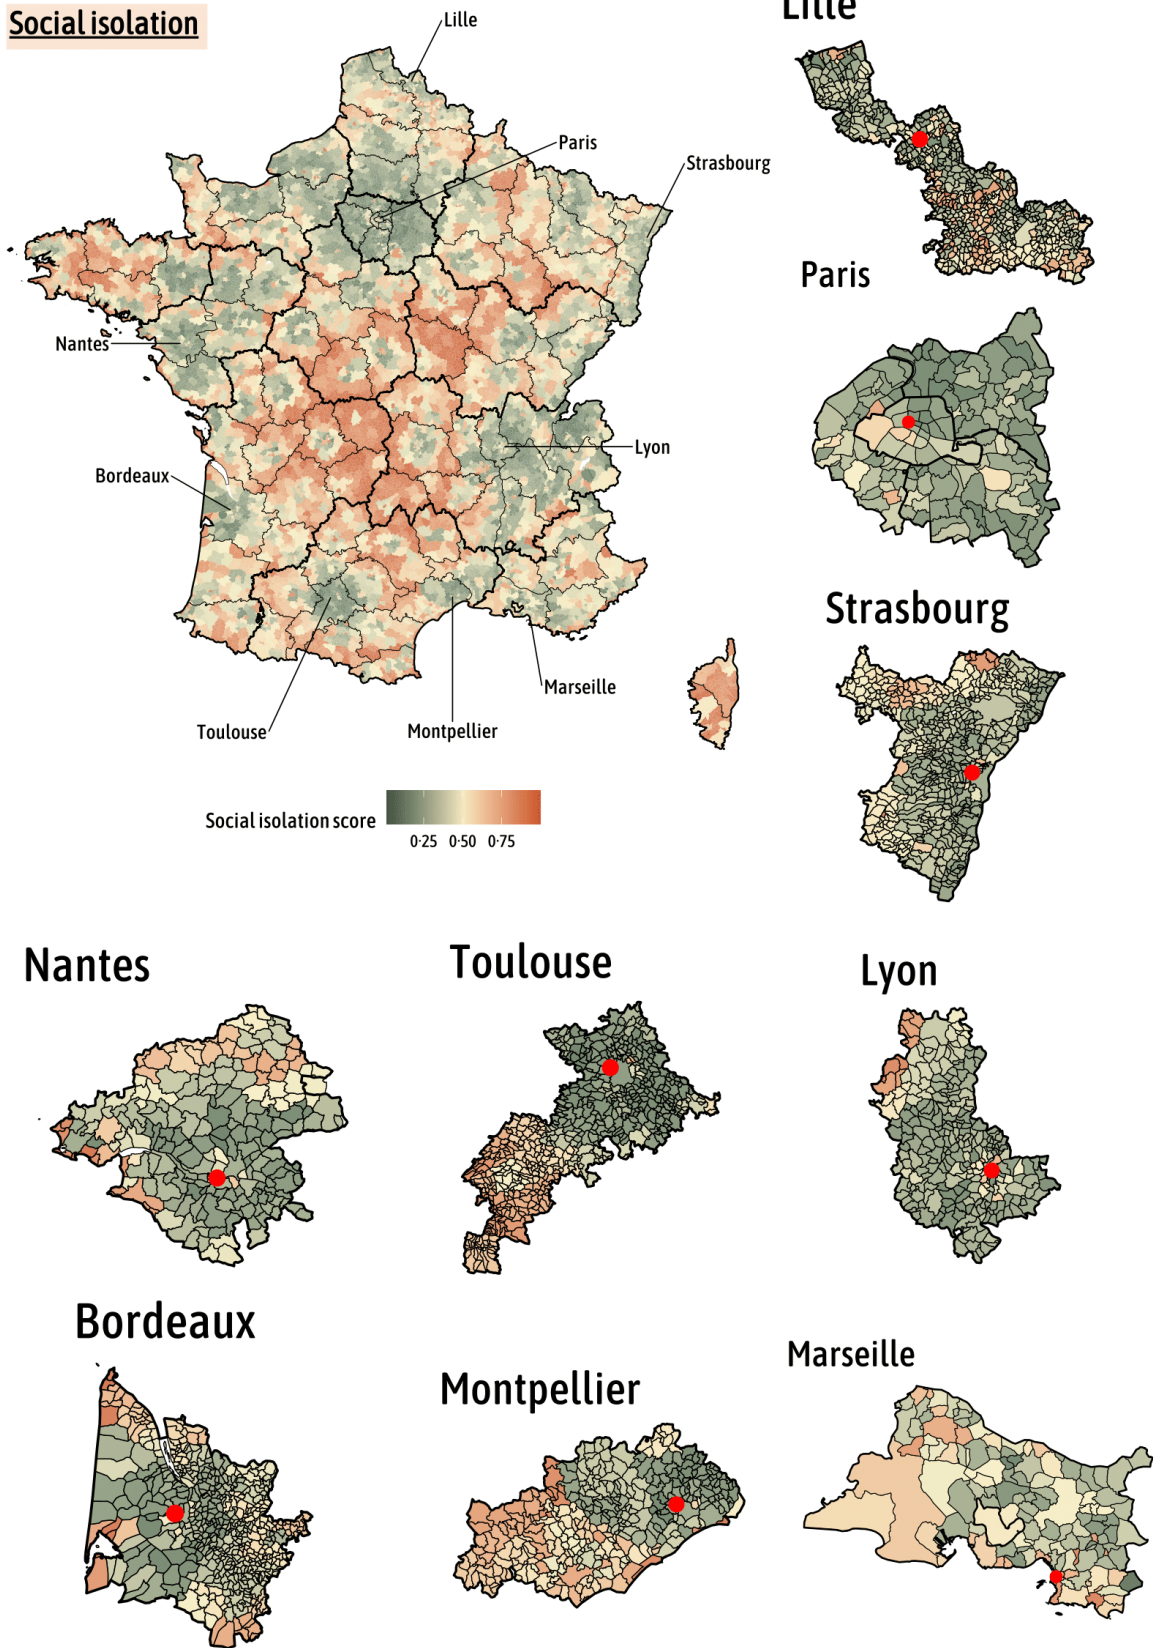



F.

**Inaccessibility to public transport**

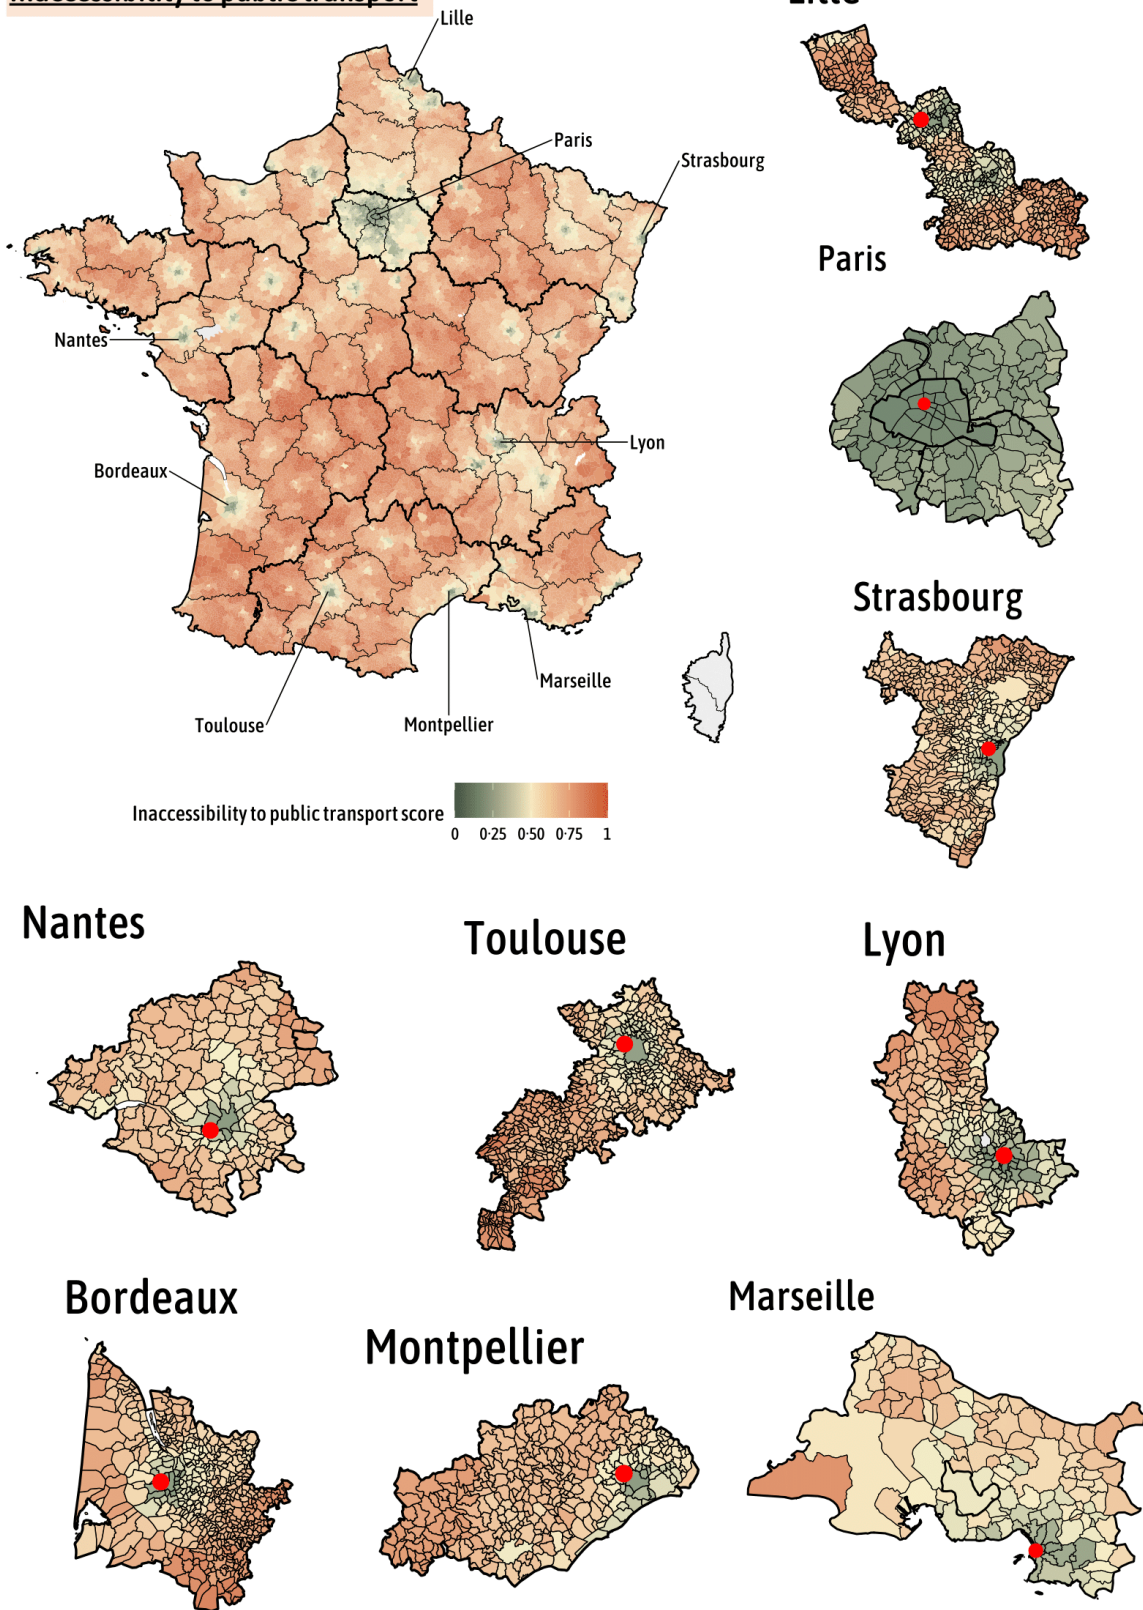

G.

**Familial hardship**

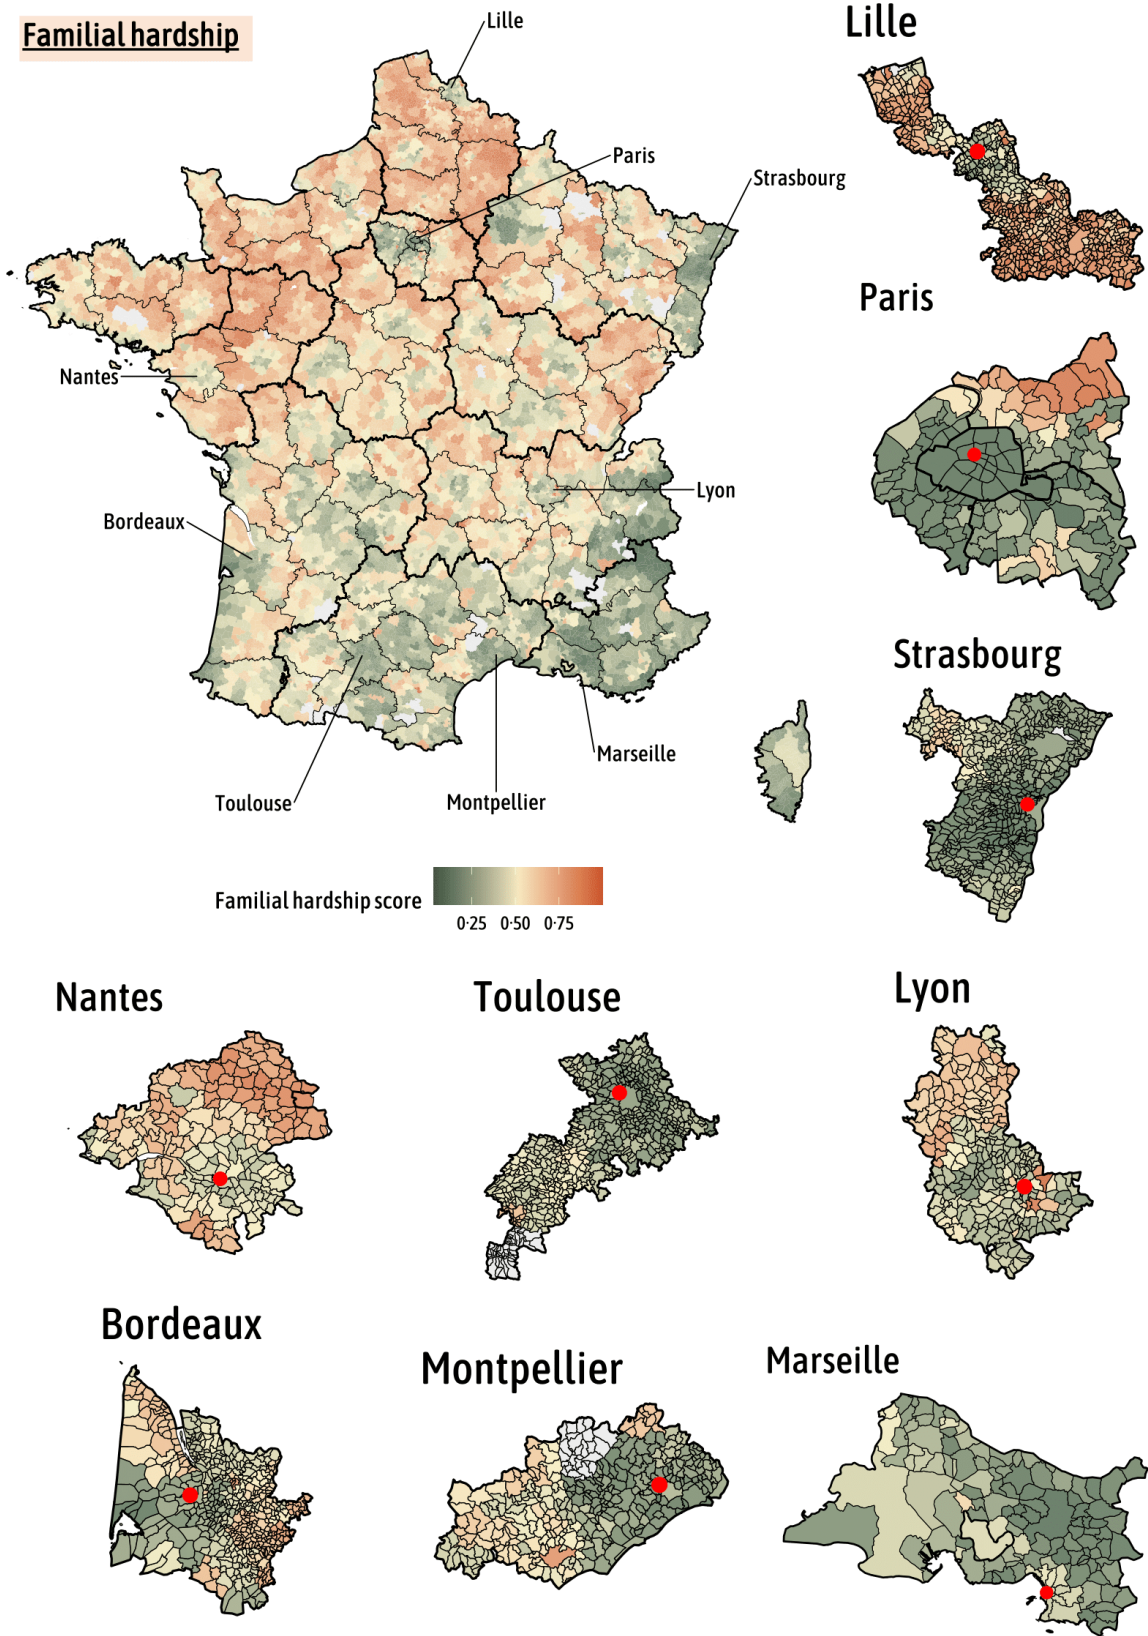



H.

**Insecurity**

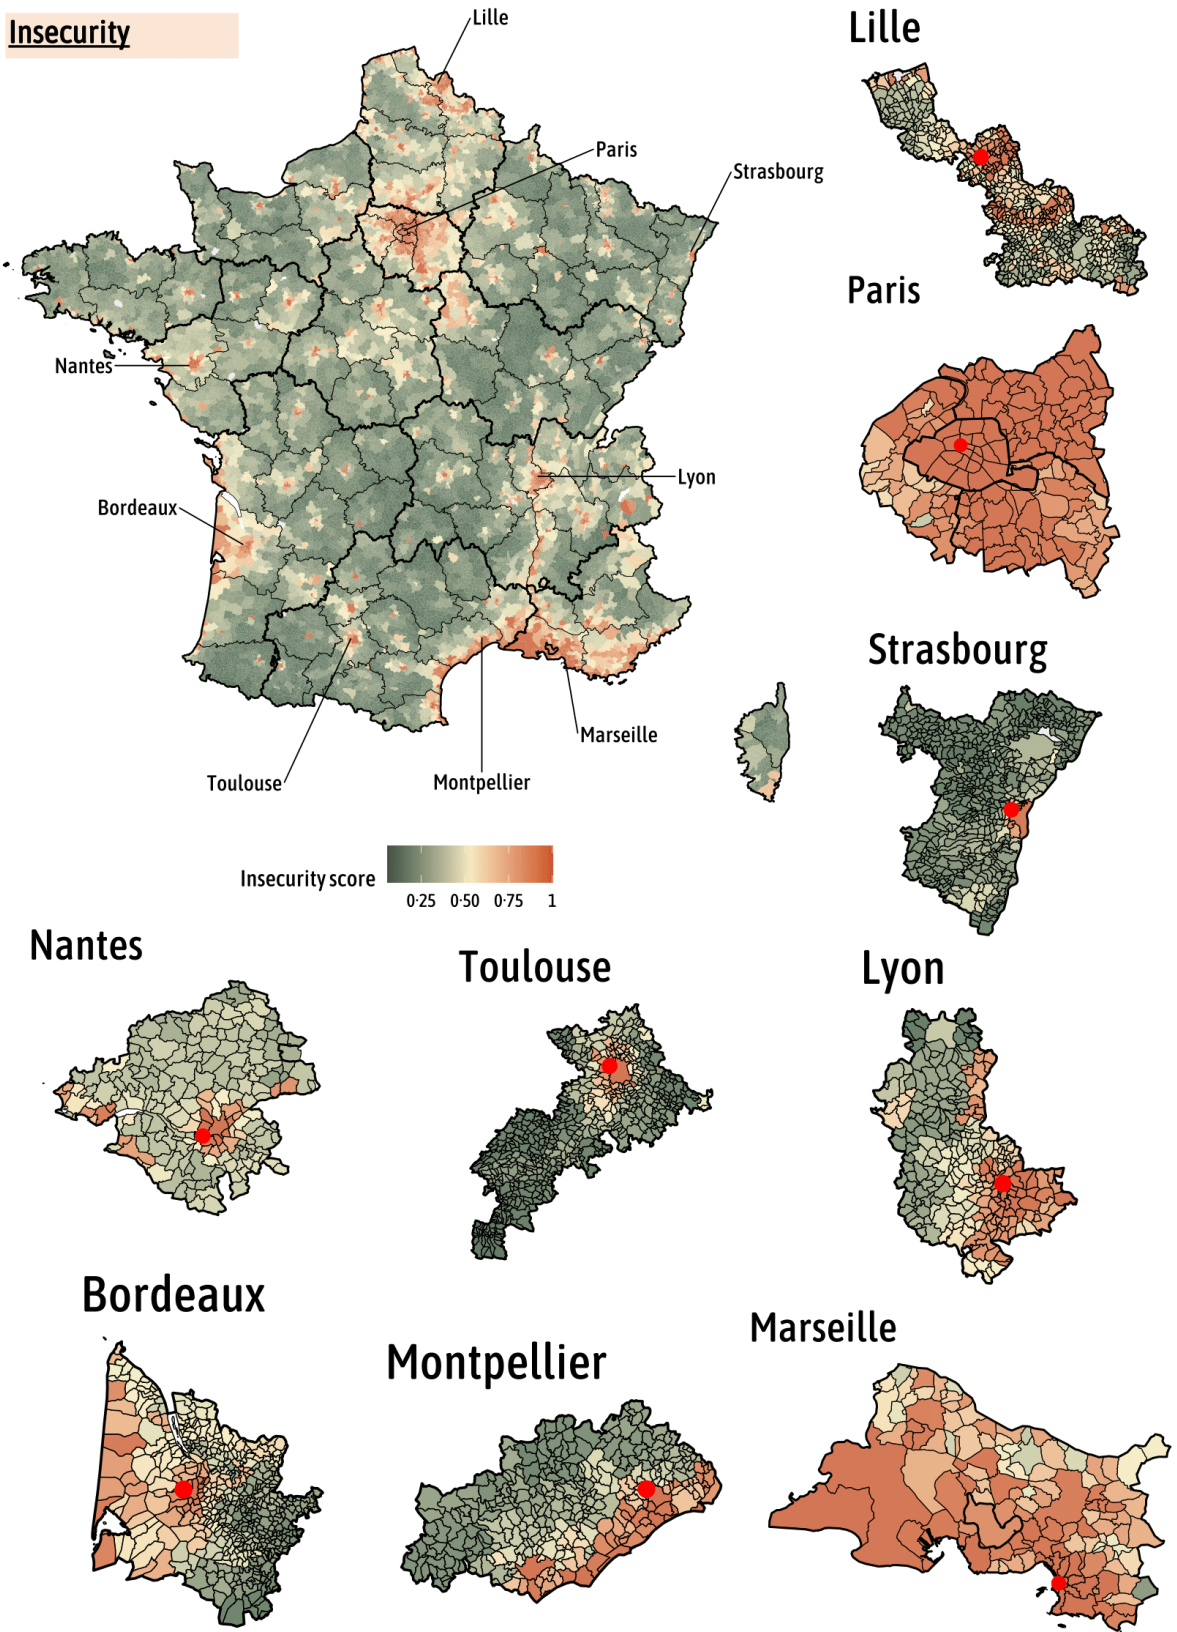

## Supplementary material 10. Sensitivity analysis: Multivariable mixed linear model with only non-sex-specific cancers

We used for this sensitivity analysis the absolute cancer care expertise index and relative cancer care expertise index after cube root transformation.

|                                     | Multivariable mixed linear regression model with only non-sex specific cancers for absolute cancer care expertise index |                |          |                         | Multivariable mixed linear regression model with only non-sex specific cancers for relative cancer care expertise index |                |          |                         |
|-------------------------------------|-------------------------------------------------------------------------------------------------------------------------|----------------|----------|-------------------------|-------------------------------------------------------------------------------------------------------------------------|----------------|----------|-------------------------|
|                                     | Coefficient                                                                                                             | 95% CI         | p-value* | Interaction Men-Women** | Coefficient                                                                                                             | 95% CI         | p-value  | Interaction Men-Women** |
| Gender                              |                                                                                                                         |                |          | p<0-0001                |                                                                                                                         |                |          | p<0-0001                |
| Men                                 | 4.20                                                                                                                    | [3.70, 4.71]   | p<0-0001 |                         | 5.74                                                                                                                    | [5.16, 6.32]   | p<0-0001 |                         |
| Women                               | 5.36                                                                                                                    | [4.77, 5.95]   | p<0-0001 |                         | 6.07                                                                                                                    | [5.43, 6.71]   | p<0-0001 |                         |
| Age, years                          |                                                                                                                         |                |          | p<0-0001                |                                                                                                                         |                |          | 0.29                    |
| Men                                 | -0.01                                                                                                                   | [-0.01, -0.01] | p<0-0001 |                         | -0.01                                                                                                                   | [-0.01, -0.01] | p<0-0001 |                         |
| Women                               | -0.02                                                                                                                   | [-0.02, -0.02] | p<0-0001 |                         | -0.01                                                                                                                   | [-0.01, -0.01] | p<0-0001 |                         |
| Number of comorbidities             |                                                                                                                         |                |          | p<0-0001                |                                                                                                                         |                |          | p<0-0001                |
| Men                                 | 0.00                                                                                                                    | [0.00, 0.01]   | 0.013    |                         | 0.01                                                                                                                    | [0.00, 0.01]   | p<0-0001 |                         |
| Women                               | -0.05                                                                                                                   | [-0.06, -0.04] | p<0-0001 |                         | -0.03                                                                                                                   | [-0.03, -0.02] | p<0-0001 |                         |
| Inaccessibility to public transport |                                                                                                                         |                |          | p<0-0001                |                                                                                                                         |                |          | p<0-0001                |
| Men                                 | -0.53                                                                                                                   | [-0.59, -0.48] | p<0-0001 |                         | -0.41                                                                                                                   | [-0.46, -0.37] | p<0-0001 |                         |
| Women                               | -1.20                                                                                                                   | [-1.33, -1.06] | p<0-0001 |                         | -0.69                                                                                                                   | [-0.79, -0.6]  | p<0-0001 |                         |
| Familial hardship                   |                                                                                                                         |                |          | p<0-0001                |                                                                                                                         |                |          | 0.055                   |
| Men                                 | -0.53                                                                                                                   | [-0.57, -0.49] | p<0-0001 |                         | -0.39                                                                                                                   | [-0.42, -0.36] | p<0-0001 |                         |
| Women                               | -0.69                                                                                                                   | [-0.80, -0.59] | p<0-0001 |                         | -0.43                                                                                                                   | [-0.50, -0.36] | p<0-0001 |                         |
| Social isolation                    |                                                                                                                         |                |          | p<0-0001                |                                                                                                                         |                |          | p<0-0001                |
| Men                                 | -0.13                                                                                                                   | [-0.17, -0.09] | p<0-0001 |                         | -0.11                                                                                                                   | [-0.14, -0.08] | p<0-0001 |                         |
| Women                               | -0.40                                                                                                                   | [-0.49, -0.31] | p<0-0001 |                         | -0.24                                                                                                                   | [-0.31, -0.18] | p<0-0001 |                         |
| Insecurity                          |                                                                                                                         |                |          | p<0-0001                |                                                                                                                         |                |          | p<0-0001                |
| Men                                 | -0.06                                                                                                                   | [-0.10, -0.01] | 0.0075   |                         | -0.03                                                                                                                   | [-0.06, 0.00]  | 0.041    |                         |
| Women                               | -0.32                                                                                                                   | [-0.41, -0.22] | p<0-0001 |                         | -0.14                                                                                                                   | [-0.21, -0.08] | p<0-0001 |                         |
| Economic deprivation                |                                                                                                                         |                |          | p<0-0001                |                                                                                                                         |                |          | 0.0084                  |
| Men                                 | -0.05                                                                                                                   | [-0.08, -0.01] | 0.0044   |                         | -0.04                                                                                                                   | [-0.06, -0.02] | 0.0003   |                         |
| Women                               | -0.14                                                                                                                   | [-0.21, -0.06] | p<0-0001 |                         | -0.08                                                                                                                   | [-0.13, -0.03] | p<0-0001 |                         |
| Educational barriers                |                                                                                                                         |                |          | 0.0001                  |                                                                                                                         |                |          | 0.039                   |
| Men                                 | -0.03                                                                                                                   | [-0.06, 0.01]  | 0.15     |                         | -0.01                                                                                                                   | [-0.03, 0.02]  | 0.50     |                         |
| Women                               | -0.12                                                                                                                   | [-0.20, -0.04] | p<0-0001 |                         | -0.04                                                                                                                   | [-0.10, 0.01]  | 0.039    |                         |
| Gender-related wage disparities     |                                                                                                                         |                |          | p<0-0001                |                                                                                                                         |                |          | p<0-0001                |
| Men                                 | -0.01                                                                                                                   | [-0.04, 0.02]  | 0.47     |                         | -0.01                                                                                                                   | [-0.03, 0.01]  | 0.16     |                         |
| Women                               | -0.11                                                                                                                   | [-0.18, -0.04] | p<0-0001 |                         | -0.07                                                                                                                   | [-0.12, -0.02] | p<0-0001 |                         |
| Unemployment                        |                                                                                                                         |                |          | 0.0002                  |                                                                                                                         |                |          | 0.0006                  |
| Men                                 | -0.02                                                                                                                   | [-0.05, 0.02]  | 0.44     |                         | -0.04                                                                                                                   | [-0.07, -0.01] | 0.0048   |                         |
| Women                               | 0.09                                                                                                                    | [0.00, 0.18]   | 0.0091   |                         | 0.03                                                                                                                    | [-0.04, 0.09]  | 0.27     |                         |

CI: Confidence interval

\* The p value demonstrates the significance of the relationships between the given social determinant and the cancer care expert index for each gender separately.

\*\* The p value indicates the significance of the interaction between men and women for each factor on the cancer care expertise indices

## REFERENCES

- 1 Bannay A, Chaignot C, Blotière P-O, *et al.* The Best Use of the Charlson Comorbidity Index With Electronic Health Care Database to Predict Mortality. *Med Care* 2016; **54**: 188–94.
- 2 Billioti de Gage S, Collin C, Le-Tri T, *et al.* Antidepressants and Hepatotoxicity: A Cohort Study among 5 Million Individuals Registered in the French National Health Insurance Database. *CNS Drugs* 2018; **32**: 673–84.
- 3 Bouyer B, Rudnichi A, Dray-Spira R, Zureik M, Coste J. Thromboembolic risk after lumbar spine surgery: a cohort study on 325 000 French patients. *J Thromb Haemost* 2018; published online June 12. DOI:10.1111/jth.14205.
- 4 Coste J, Blotiere P-O, Miranda S, *et al.* Risk of early neurodevelopmental disorders associated with in utero exposure to valproate and other antiepileptic drugs: a nationwide cohort study in France. *Sci Rep* 2020; **10**: 17362.
- 5 Giral P, Neumann A, Weill A, Coste J. Cardiovascular effect of discontinuing statins for primary prevention at the age of 75 years: a nationwide population-based cohort study in France. *Eur Heart J* 2019; **40**: 3516–25.
- 6 Jabagi MJ, Vey N, Goncalves A, Tri TL, Zureik M, Dray-spira R. Risk of secondary hematologic malignancies associated with breast cancer chemotherapy and G-CSF support: A nationwide population-based cohort. *International Journal of Cancer* 2020; **n/a**. DOI:https://doi.org/10.1002/ijc.33216.
- 7 Lemaitre M, Kirchengesner J, Rudnichi A, *et al.* Association Between Use of Thiopurines or Tumor Necrosis Factor Antagonists Alone or in Combination and Risk of Lymphoma in Patients With Inflammatory Bowel Disease. *JAMA* 2017; **318**: 1679–86.
- 8 Maura G, Bardou M, Billionnet C, Weill A, Drouin J, Neumann A. Oral anticoagulants and risk of acute liver injury in patients with nonvalvular atrial fibrillation: a propensity-weighted nationwide cohort study. *Scientific Reports* 2020; **10**: 11624.
- 9 Sbidian E, Mezzarobba M, Weill A, Coste J, Rudant J. Persistence of treatment with biologics for patients with psoriasis: a real-world analysis of 16 545 biologic-naïve patients from the French National Health Insurance database (SNIIRAM). *Br J Dermatol* 2019; **180**: 86–93.
- 10 Semenzato L, Botton J, Drouin J, Cuenot F, Weill A, Zureik M. Maladies chroniques, états de santé et risque d’hospitalisation et de décès hospitalier pour COVID-19 lors de la première vague de l’épidémie en France: Étude de cohorte de 66 millions de personnes. 2021; : 41.
- 11 World Health Organization. International Classification of Diseases (ICD). <https://www.who.int/standards/classifications/classification-of-diseases>.
